1 **Histone deacetylase 6 inhibition promotes microtubule acetylation and facilitates**  
2 **autophagosome-lysosome fusion in dystrophin-deficient *mdx* mice**

3 Akanksha Agrawal<sup>1</sup>, Erin L. Clayton<sup>1</sup>, Courtney L. Cavazos<sup>1</sup>, Benjamin A. Clayton<sup>1</sup>,

4 George G. Rodney<sup>1\*</sup>

5 1. Department of Integrative Physiology, Baylor College of Medicine, Houston, TX, USA

6

7 \*All correspondence should be sent to [rodney@bcm.edu](mailto:rodney@bcm.edu)

8 **Abstract**

9 Duchenne Muscular Dystrophy (DMD) is a severe X-linked genetic disorder. Defective autophagy  
10 and disorganized microtubule network contributes to DMD pathogenesis, yet the mechanisms by  
11 which microtubule alterations regulate autophagy remain elusive. We show decreased acetylated  
12  $\alpha$ -tubulin and enhanced histone deacetylase (HDAC6) expression in *mdx* mice. Pharmacological  
13 inhibition of HDAC6 increases tubulin acetylation and enhances Q-SNARE complex formation,  
14 leading to improved autophagosome-lysosome fusion. HDAC6 inhibition reduces apoptosis,  
15 inflammation, muscle damage and prevents contraction induced force loss. HDAC6 inhibition  
16 restores peroxiredoxin (PrxII) by increasing its acetylation and protecting it from hyper-oxidation,  
17 hence modulating intracellular redox status in *mdx* mice. Genetic inhibition of Nox2 activity in  
18 *mdx* mice promotes autophagosome maturation. Our data highlight that autophagy is differentially  
19 regulated by redox and acetylation in *mdx* mice. By restoring tubulin acetylation HDAC6  
20 inhibition enhances autophagy, ameliorates the dystrophic phenotype and improves muscle  
21 function, suggesting a potential therapeutic target for treating DMD.

22 **Introduction**

23 Duchenne Muscular Dystrophy (DMD) is the X-linked recessive genetic disorder caused by  
24 mutations in *DMD* gene which encodes for dystrophin (Dp427m), a key component of the

25 dystrophin-glycoprotein complex (DGC). It affects approximately 1:4000 to 1:5000 live male  
26 births worldwide<sup>1</sup> resulting in progressive muscle wasting and degeneration, leading to death due  
27 to cardiac dysfunction and respiratory failure<sup>2</sup>. Over the past two decades, several therapeutic  
28 approaches have been evaluated to combat the pathogenesis of the disease, but DMD is still  
29 incurable. Novel genetic approaches hold promising therapy;<sup>3</sup> however, many challenges still  
30 exist due to the variability in exon skipping efficiency among patients, the non-homogenous  
31 restoration of dystrophin between muscle types (including absence of effect of current exon  
32 skipping agents on cardiac muscle), and minimal alterations in immune cell infiltration. In order  
33 to combat these limitations, the treatment plan for DMD will likely entail a combination of genetic  
34 and pharmacological interventions.

35 Dystrophin is a large cytoskeletal protein located at the sarcolemma that mechanically links the  
36 internal cytoskeleton to the extracellular matrix and is critical for muscle-membrane stability  
37 during contraction<sup>4</sup>. Lack of dystrophin results in disassembly of the DGC and increases the  
38 sarcolemma susceptibility to contraction-induced injury<sup>5</sup>. This leads to a series of pathological  
39 events including, increased ROS signaling, aberrant Ca<sup>2+</sup> release, inflammation, impaired  
40 autophagy, fibrosis, apoptosis, and decreased force production.<sup>5,6,7</sup>

41 Macroautophagy, hereafter referred to as autophagy, is a highly conserved process involving a  
42 series of sequential events for bulk degradation of cytosolic components and organelles through  
43 delivery of autophagosomes to lysosomes, and thus, maintaining cellular homeostasis.<sup>8</sup>  
44 Accumulating evidence shows that impaired autophagy contributes to muscle weakness and cell  
45 death in both *mdx* mice (mouse model of DMD) and DMD patients<sup>9,10</sup>. Recent work from our lab  
46 has shown that Nox2/Src kinase impairs autophagy by regulating the PI3K/Akt/mTOR pathway  
47 in *mdx* mice<sup>7</sup>. To better comprehend how defective autophagy leads to DMD pathophysiology,

48 and to develop therapeutic strategies, we need to elucidate the defects at different steps of the  
49 autophagic pathway.

50 Dystrophin is a microtubule-associated protein found to bind microtubules (MT).<sup>11</sup> The MT lattice  
51 becomes disorganized when dystrophin expression is ablated as in the *mdx* mouse<sup>11, 12, 13</sup>. We have  
52 shown that the increased Nox2-ROS observed in *mdx* skeletal muscle regulates the MT network<sup>14</sup>.  
53 MTs undergo post-translational modifications that regulate their biological functions. Some  
54 studies suggest detyrosination of  $\alpha$ -tubulin increases muscle stiffness and decreases force  
55 production in *mdx* mice<sup>15, 16</sup>. In non-muscle cells, acetylation of  $\alpha$ -tubulin has been shown to  
56 regulate the formation of pre-autophagosomal structures, vesicular movements and  
57 autophagosome-lysosome fusion<sup>17, 18, 19</sup>. Acetylated MTs recruit the motor protein kinesin-1 to  
58 transport autophagosomes in a cargo-specific manner along the MT tracks. Changes in MT  
59 acetylation leads to alterations in MT dynamics and organization, cell migration, and autophagy<sup>18</sup>,  
60<sup>20</sup>. Despite the extensive investigations largely based on MT dynamics, stability and its altered  
61 network in dystrophic mice, no study has addressed the role of acetylated MTs specifically on  
62 autophagosome biogenesis and autophagosome-lysosome fusion in DMD. Therefore, the present  
63 study was designed to unravel the plausible mechanisms underpinning the role of MTs in  
64 regulating autophagy in dystrophic mice.

65 Histone deacetylases (HDACs) are a class of deacetylase enzymes involved in chromatin  
66 remodeling and gene expression<sup>21</sup>. Currently, epigenetic drugs (e.g. Givinostat) targeting HDACs  
67 are in phase III clinical trials to assess their functional effects in DMD patients<sup>2, 22</sup>. Recently,  
68 HDAC6 (Class IIb) inhibition has emerged as one potential selective pharmacological target in  
69 neurodegenerative diseases. HDAC6 catalyzes the deacetylation of non-histone proteins such as  
70  $\alpha$ -tubulin, leading to altered MT stability and organization<sup>23</sup>. In addition, HDAC6 can control

71 redox regulation through acetylation of peroxiredoxin (Prx1 and PrxII)<sup>24, 25</sup>. Therefore, selective  
72 HDAC6 inhibition has the potential to reduce the toxicity related to the off-target effects of pan-  
73 HDAC inhibitors (Givinostat).<sup>26</sup> Recent investigations have suggested that the HDAC6 inhibitor,  
74 Tubastatin A (TubA) promotes MT acetylation, improving autophagic flux, redox balance, and  
75 functional recovery in neurodegenerative disorders<sup>19, 27, 28, 29</sup>, cardiomyopathy<sup>30</sup>, idiopathic  
76 pulmonary fibrosis<sup>31</sup>, myocardial ischemia/reperfusion injury<sup>32</sup>, osteoarthritis<sup>33</sup>, and kidney injury  
77<sup>34</sup>. In the current study, we show differential regulation of autophagy in *mdx* skeletal muscle; while  
78 autophagosome maturation is regulated by Nox2-ROS, autophagosome-lysosome fusion is  
79 regulated by MT acetylation. Furthermore, we discovered the therapeutic efficacy of HDAC6  
80 inhibitor, TubA, in promoting MT acetylation and restoring autophagic flux in *mdx* mice. TubA  
81 treatment significantly restricted muscle damage and apoptosis and induced muscle functional  
82 recovery.

## 83 **Results:**

### 84 **Impaired autophagosomal biogenesis/maturation in *mdx* mice**

85 The maturation of double-membrane vesicle structures called autophagosomes occurs in a highly  
86 orchestrated manner to achieve successful delivery to the lysosomes for fusion<sup>35</sup>. One of the initial  
87 steps in autophagosome biogenesis is the recruitment and activation of the class III  
88 phosphatidylinositol 3-kinase complex (PI3K), consisting of Beclin, ATG14L, VPS34, and VPS15  
89 to facilitate the phagophore nucleation<sup>36</sup>. Immunoblot analyses of TA muscle homogenate revealed  
90 a significant decrease in ATG14L and VPS34, whereas both Beclin and VPS15 were found to be  
91 increased in *mdx* muscles as compared to WT (**Fig.1a-b**). Immunoprecipitation of Beclin followed  
92 by western blot for ATG14L showed decreased ATG14L/Beclin complex formation in *mdx* muscle  
93 as compared to WT while Bcl-2/Beclin complex formation was not altered (**Fig. 1c**). These data

94 are consistent with inhibition of vesicle nucleation in *mdx* mice. Autophagy induction by  
95 heterodimerization of Beclin with ATG14L-VPS34 is regulated by activated JNK. JNK-  
96 interacting protein 1 (JIP-1) binds protein kinases (e.g. MAPKK/MKK7) to promote  
97 phosphorylation and activation of JNK<sup>37</sup>. We observed that the protein expressions levels of JIP-  
98 1 and p-JNK (Thr183/Ty185) are downregulated in *mdx* skeletal muscle, whereas MAPKK was  
99 significantly upregulated in *mdx* mice (**Fig 1d-e**). P-JNK phosphorylates Bcl-2 (S70), which  
100 disrupts the Bcl-2/Beclin complex, allowing Beclin to bind the PI3KclassIII complex for  
101 phagophore nucleation. We found lower levels of p-Bcl-2 in *mdx* muscles as compared to WT,  
102 likely due to the decrease in p-JNK levels (**Fig 1d-e**). Together, these observations suggest that  
103 phagophore nucleation is disrupted due to inhibition of JIP-1/JNK activation and subsequent  
104 phosphorylation of Bcl-2 in *mdx* mice.

105 Vesicle nucleation is followed by elongation and expansion of the phagophore in the cytoplasm,  
106 which is regulated by the ATG5-12 complex. Our data revealed that WIPI-1 (WD Repeat Domain  
107 Phosphoinositide Interacting 1), an early marker of autophagosome formation which fosters the  
108 recruitment of downstream ATGs, was significantly downregulated in *mdx* muscle (**Fig. 1f-g**)  
109 whereas ATG7, ATG4B, and ATG5-12 did not show any prominent change in *mdx* as compared  
110 to WT (**Fig. 1f-g**). In addition, gene expression analysis of autophagy related markers *uvrag*,  
111 *vps34*, *atg14l*, *FIP200*, *atg5*, *atg12*, and *gabarapl1* did not show any change in *mdx* skeletal  
112 muscle as compared to WT (**Fig.S1**). Together, our data suggests that defects in the  
113 autophagosome maturation is due to inhibition of vesicle nucleation and elongation of the  
114 phagophore in *mdx* skeletal muscle.

115 **Impairment in the SNARE-mediated autophagosomal-lysosomal fusion in *mdx* mice**

116 To clear sequestered cytosolic components the autophagosome must fuse with the lysosome,  
117 forming the autolysosome. The process of autophagosome-lysosome fusion is regulated by the  
118 SNARE tertiary complex STX17-SNAP29-VAMP8. To achieve autophagosome-lysosome fusion,  
119 autophagosome-localized Q-SNARE STX17 must interact with SNAP29 and the lysosomal-  
120 localized R-SNARE VAMP8. ATG14L acts as a tethering factor to facilitate the fusion by directly  
121 interacting with the STX17-SNAP29 binary complex, and primes it for binding to VAMP8 on  
122 lysosomes<sup>38</sup>. We found that STX17 was significantly decreased in *mdx* as compared to WT, while  
123 VAMP8 and SNAP29 both showed no change (**Fig. 2a-b**). CO-IP with anti-SNAP29 in TA muscle  
124 lysates revealed reduced interaction of SNAP29 with STX17 and VAMP8 in *mdx* muscle whereas  
125 SNAP29 retained binding with ATG14L (**Fig. 2c**). CO-IP with an anti-VAMP8 showed less  
126 interaction of VAMP8 with STX17, SNAP29, and ATG14L (**Fig. S2a**), confirming reduced  
127 autophagosome-lysosome fusion in *mdx* skeletal muscle.

128 Acetylation of STX17 inhibits the interaction between STX17 and SNAP29, and formation of the  
129 Q-SNARE complex<sup>39</sup>. Therefore, we asked whether STX17 acetylation is impaired in *mdx* muscle,  
130 leading to reduced interaction between the Q-SNARE complexes. We observed decreased  
131 acetylation of STX17 in *mdx* muscle compared to WT. We also found increased expression of  
132 HDAC2, the primary deacetylase of STX17<sup>39</sup> in *mdx* muscle (**Fig. S2b-d**). These data suggest that  
133 the reduced interaction in the Q-SNARE complex in *mdx* muscle is not due to increased acetylation  
134 of STX17.

### 135 **Genetic ablation of p47<sup>phox</sup> promotes autophagosomal maturation without facilitating** 136 **autolysosome formation in *mdx* mice**

137 We have previously shown that genetic deletion of p47<sup>phox</sup> function in *mdx* mice protects against  
138 oxidative stress and improves autophagy (i.e. increased LC3II/I and decreased p62) compared with

139 *mdx*<sup>7</sup>. Having established defects at multiple stages in autophagy, including autophagosome  
140 maturation and autolysosome formation in *mdx* mice, we asked whether these steps are regulated  
141 by Nox2-ROS in *mdx* skeletal muscle. We found increased p-JNK, p-Bcl-2 and JIP-1 protein levels  
142 (**Fig. 3b-c**), as well as increased Beclin-ATG14L complex formation and a decrease in the Beclin-  
143 Bcl-2 complex (**Fig. 3a**); all consistent with improved vesicle nucleation. We also found an  
144 increase in the autophagy elongation complex, ATG5-12 in p47<sup>-/-</sup>/*mdx* mice (**Fig. 3d-e**). We then  
145 determined whether autophagosome-lysosome fusion is affected by genetic deletion of p47<sup>phox</sup> in  
146 *mdx* mice. Interestingly, we did not find any improvement in the interaction between STX17-  
147 SNAP29-VAMP8 tertiary complexes in p47<sup>-/-</sup>/*mdx* mice as compared to *mdx* mice (**Fig 3f**). In  
148 addition, no changes were found in the lysosomal protein LAMP2 and lysosomal hydrolase,  
149 Cathepsin B in p47<sup>-/-</sup>/*mdx* mice as compared with *mdx* (**Fig. 3g-h**). Overall, our data indicates that  
150 inhibition of Nox2-ROS promotes autophagosome maturation but does not enhance the fusion of  
151 autophagosomes with lysosomes in *mdx* mice.

### 152 **Altered MTs acetylation affects autophagy**

153 Emerging evidence shows that reversible acetylation of  $\alpha$ -tubulin can regulate MT function, thus,  
154 facilitating fusion of autophagosomes to lysosomes<sup>40, 41</sup>. The acetylation status of microtubules is  
155 coordinated by deacetylases (HDAC6)<sup>23</sup> and acetyltransferases (MEC-17)<sup>42</sup>. Immunoblot  
156 analyses showed that the  $\alpha$ -tubulin acetylation levels were significantly decreased in *mdx* muscles  
157 as compared to WT (**Fig. 4a-b**). The deacetylase enzyme HDAC6 was increased in *mdx* muscle  
158 (**Fig. 4a-b**) whereas the acetyltransferase (MEC17) did not exhibit any change in *mdx* muscle  
159 (**Fig.S3a-b**). At the mRNA level, expressions of *hdac6*, *mec17* genes did not show any change in  
160 *mdx* as compared to WT (**Fig.S3c-d**). Autophagosome movement along MT tracks is dependent  
161 upon the microtubule motor proteins kinesin and dynein. Kinesin-1 (conventional kinesin or

162 KIF5), is a tetramer of two kinesin heavy chains (KHC, KIF5B) and two kinesin light chains (KLC)  
163 <sup>43</sup>. We found that KIF5B was significantly increased in *mdx* muscles whereas KLC and dynein  
164 did not change in *mdx* as compared to WT (**Fig.4c-d**). KLCs play a dual role, they direct cargo  
165 binding and regulate motor activity. JIP-1 scaffolds with kinesin to link cargo to the kinesin-1  
166 complex (KHC/KLC) <sup>44</sup>. These observations raised the question of whether the JIP-Kinesin-1  
167 complex is disrupted and thereby decreases binding to MTs and impairing autophagosome  
168 transport in *mdx* muscle. Surprisingly, JIP-1 was found to interact with both KLC and JNK in *mdx*  
169 mice similar to WT (**Fig.4e**). In addition, we did not find any restoration of acetylated  $\alpha$ -tubulin  
170 levels in *p47<sup>-/-</sup>/mdx* mice (**Fig. 4f-g**). Overall, our data strongly suggests that microtubule  
171 acetylation plays an important role in autophagosome-lysosome fusion in *mdx* mice, which does  
172 not appear to be regulated by Nox2-ROS.

### 173 **HDAC6 inhibition improves MT acetylation and promotes autophagosome-lysosome fusion** 174 **in *mdx* muscle**

175 Acetylated microtubules play an important role in vesicle trafficking and fusion. To assess the  
176 relationship of HDAC6 activity with microtubule alterations and impaired autophagic flux,  
177 HDAC6 was inhibited with its specific pharmacological inhibitor, Tubastatin A (TubA). TubA  
178 was intraperitoneally injected for 2 weeks in 3 week old *mdx* mice, which is just before the onset  
179 of disease progression. The dose given to the *mdx* mice was 70mg/kg per day which is equivalent  
180 to 8.4mg/kg per day for a human child based on FDA approved mouse to human-equivalence dose  
181 calculation guide<sup>45</sup>. TubA restored  $\alpha$ -tubulin acetylation levels without altering the protein  
182 expression levels of either de-tyrosinated  $\alpha$ -tubulin or HDAC6 (**Fig.5a-b**) nor kinesin, JIP-1, or  
183 JNK (**Fig.S4a-b**). We next assessed whether the increased acetylation of  $\alpha$ -tubulin improved  
184 autophagic flux in *mdx* muscle. The autophagosome substrate p62 (SQSTM1) was significantly



185 decreased in TubA treated *mdx* muscle while lipidation of microtubule-associated protein 1A/1B-  
186 light chain 3 (LC3II), which makes up the autophagosomal membrane showed only a small  
187 increase (**Fig. 5c-d**). To further examine the mechanism behind the efficient autophagic clearance  
188 in TubA treated *mdx*, we evaluated the autophagosome-lysosome fusion by detecting the binding  
189 of SNARE complex proteins. TubA treatment enhanced the interaction of SNAP29 with STX17  
190 and VAMP8 (**Fig.5e**). Immunostaining of SNAP29 and VAMP8 showed puncta within the muscle  
191 and increased colocalization in TubA treated *mdx* muscle as compared to non-treated, indicative  
192 of enhanced autophagosome-lysosome fusion by HDAC6 inhibition (**Fig.5f-g**). In addition, the  
193 lysosomal protein LAMP2 and cleaved (active) lysosomal hydrolase cathepsin-B are elevated in  
194 TubA treated *mdx* muscle (**Fig. 5h-i**). Overall, our data suggest that the decreased acetylation of  
195  $\alpha$ -tubulin in *mdx* muscle inhibits autophagosome-lysosome fusion, which can be recovered upon  
196 HDAC6 inhibition.

#### 197 **HDAC6 inhibition recovers acetylation of PrxII and increases total PrxII in *mdx* mice**

198 Prx I and Prx II are specific substrates of HDAC6, their acetylation status provides resistance to  
199 hyperoxidation. We have previously shown hyperoxidation and proteolytic degradation of PrxII  
200 in *mdx* skeletal muscle<sup>46</sup>. Here, we immunoprecipitated PrxII and probed for acetyl lysine and found  
201 decreased acetylated PrxII levels in *mdx* mice, which was recovered back to WT in TubA treated  
202 *mdx* mice (**Fig 6a**). This was further confirmed by immunoprecipitating acetyl lysine followed by  
203 probing for PrxII (**FigS5a**). Total PrxII levels were found to be significantly increased in TubA-  
204 *mdx* mice while oxidized PrxII (PrxSO<sub>2/3</sub>) showed no difference as compared to *mdx* (**Fig. 6b-c**).  
205 Our findings suggests that TubA did not decrease PrxSO<sub>2/3</sub> is not surprising, as sulfonation of PrxII  
206 is an irreversible oxidative modification<sup>47</sup>. We did find that the ratio of oxidized PrxII to total  
207 PrxII is significantly reduced in TubA-treated *mdx* (**Fig. 6b-c**), indicating that the increased

208 acetylation of PrxII prevents its hyperoxidation. To our surprise, we found that stretch activated  
209 ROS production was not diminished in diaphragm muscle from TubA treated *mdx* compared to  
210 *mdx* (**Fig.6d**). Intriguingly, acetylated PrxII levels were restored back to WT levels in *p47<sup>-/-</sup>/mdx*  
211 mice (**Fig. S5b-c**). Total PrxII was increased, PrxSO<sub>2</sub>/3 decreased, and the ratio of oxidized to  
212 total PrxII decreased in *p47<sup>-/-</sup>/mdx* as compared to *mdx*. (**Fig. S5d-e**). These data suggest that either  
213 reducing oxidative stress (*p47<sup>-/-</sup>/mdx*) or increasing acetylation of PrxII (TubA) prevents its  
214 hyperoxidation and degradation in *mdx* skeletal muscle.

### 215 **TubA treatment alleviates apoptosis and immune cell infiltration in *mdx* muscle**

216 Impaired autophagy is associated with aggregation of oxidized/misfolded proteins and other  
217 cellular constituents, eventually leading to cell death. Immunoblot expression of cleaved/active  
218 caspase-3 was found to be significantly reduced in *mdx* mice following treatment with TubA  
219 (**Fig.7a-b**). The percentage of TUNEL positive nuclei (*green, marked by white arrows*) were  
220 significantly elevated in *mdx* gastrocnemius (GAS) muscle, which were significantly decreased  
221 upon treatment with TubA (RI<sub>TubA</sub> =92.14%, **Fig. 7c-d**). Infiltration of macrophages and other  
222 immune cells is an important and pathogenic feature of dystrophin-deficient muscle, even at  
223 asymptomatic stage of disease progression. We have stained GAS muscle cross-sections with anti-  
224 CD68 antibody to identify CD68<sup>+</sup> macrophages. We found a significant decrease in CD68<sup>+</sup>  
225 immune cells (*green, marked by white arrows*) in TubA treated *mdx* skeletal muscle (RI  
226 <sub>TubA</sub>=63.10%, **Fig. 7e-f**), indicating decreased infiltration of macrophages in the endomysium of  
227 skeletal muscles.

### 228 **Amelioration of dystropathology and improvement in muscle functional assessment** 229 **following TubA treatment**

230 Since pharmacological inhibition of HDAC6 improved MT acetylation, restored autophagic flux  
231 by promoting autophagosome-lysosome fusion, and decreased inflammation and apoptosis we  
232 next investigated whether TubA reduced muscle damage and improved muscle performance.  
233 Treatment of *mdx* mice with TubA prevented the increase in serum creatine phosphokinase (CPK  
234 activity ( $RI_{TubA}=133.81\%$ , **Fig. 8a**), a widely used clinical marker of muscle damage. The etiology  
235 of DMD can be explained by loss of membrane integrity due to dystrophin deficiency which results  
236 in degeneration of myofibers. To determine whether TubA affects sarcolemmal integrity, we  
237 intraperitoneally injected mice with Evans blue dye (EBD), which penetrates non-specifically into  
238 any cell with disrupted/leaky membranes. At 24 h after injection, EBD accumulated abundantly in  
239 *mdx* muscles as compared to WT muscles (**Fig. 8b**), confirming membrane permeability due to the  
240 loss of dystrophin. Notable, TubA treatment significantly blunted EBD uptake into the DIA muscle  
241 of *mdx* mice. This observation was further confirmed by fluorescence staining of cross-sections of  
242 DIA muscles, the number of EBD positive fibers were reduced in *mdx* mice treated with TubA ( $RI$   
243  $_{TubA}=85.81\%$ , **Fig.8c**).

244 We next assessed the histopathological features of TA muscles from WT, *mdx* and TubA treated  
245 *mdx* mice by H& E staining. We observed severe necrosis (*marked by black arrow*), regenerating  
246 fibers with central nuclei (*marked by black arrow head*), and fat deposition in the interstitial space  
247 (*marked by black asterisk*) of dystrophic muscle as compared to WT muscles. Notably, overall  
248 necrotic myofibers, central nuclei, and fat depositions were reduced in TubA treated *mdx* (**Fig.8d**).  
249 We further quantified histological sections of TA muscles by immunostaining with  $\alpha$ -laminin  
250 (*green*) and DAPI (*blue*) to analyze the cross-sectional area (CSA) and centronucleated myofibers  
251 in treated and untreated *mdx* mice (**Fig.8d**). A drastic increase in the percentage of fibers with  
252 centralized nuclei was observed in *mdx* TA muscle as compared to WT (46% versus 1.2%), which

253 was significantly reduced in TubA-treated *mdx* muscle ( $RI_{TubA} = 52.2\%$ , **Fig. 8e**). TA muscle from  
254 *mdx* mice showed decreased cross-sectional area (CSA) as compared to WT, which was partially  
255 prevented with TubA treatment as exhibited by the distribution of Minimal Feret's diameter (**Fig**  
256 **8f**). DMD patients suffer from progressive muscle weakness, eventually leading to immobility and  
257 respiratory failure. To examine whether TubA improves muscle function and strength, *in-vivo*  
258 muscle functional performance was assessed by grip strength. Grip strength was conducted after  
259 completion of 2 weeks of TubA treatment in *mdx* mice. Skeletal muscle strength was significantly  
260 improved in TubA treated *mdx* mice as compared to non-treated *mdx* mice ( $RI_{TubA} = 113.29\%$ , **Fig.**  
261 **8g-h**). Finally, to determine the effects on contractile function, we compared the force-generating  
262 capacities of untreated and TubA-treated *mdx* diaphragm muscle strips electrically stimulated *ex*  
263 *vivo*. TubA-treated *mdx* mice demonstrated significantly greater diaphragmatic force production  
264 over a broad range of stimulation frequencies (0 to 200 Hz) (**Fig. 8i, Table 1**). In addition, TubA  
265 treated *mdx* EDL muscle was significantly protected from eccentric contraction induced force loss  
266 compared to *mdx* muscle (**Fig. 8j, Table 1**).

## 267 **Discussion**

268 Previous studies have shown that defective autophagy and disorganized MT network play an  
269 important role in disease progression and contributes to DMD pathogenesis before the  
270 manifestation of severe phenotypes<sup>11,48, 49, 50, 51</sup>. Therefore, reverting autophagic dysfunction could  
271 be an efficient approach to slow the onset of disease progression and improve the muscle function  
272 in DMD patients. Our group was the first to identify that Nox2 mediates MT alterations and  
273 autophagic dysfunction in dystrophic muscle<sup>7, 14</sup>. MTs regulate autophagy through their  
274 scaffolding and transport functions. Acetylated MTs induce autophagy by facilitating intracellular  
275 trafficking and fusion of autophagosomes with lysosomes<sup>18, 19, 52</sup>. Despite the number of

276 investigations, no consensus about the role of tubulin post translational modifications in regulating  
277 autophagic flux in DMD have been reached. We are the first to report that autophagy is  
278 differentially controlled by redox and acetylation modifications in *mdx* mice (**Fig. 9**). We provide  
279 evidence that genetic ablation of Nox-2 in *mdx* mice promotes autophagosome maturation without  
280 facilitating autophagosome-lysosome fusion. Further, our study reveals alterations in MT  
281 acetylation in dystrophin-deficient muscle, which is not restored back in Nox-2 ablated *mdx* mice.  
282 Pharmacologically targeting HDAC6 restored MT acetylation, rescued autophagy by accelerating  
283 fusion and content degradation, restricted muscle damage and improved muscle function in *mdx*  
284 mice.

285 Autophagosome biogenesis/maturation includes phagophore nucleation, expansion, and closure of  
286 phagophore membranes, generating the complete autophagosome<sup>36</sup>. Initiation of autophagy  
287 requires the PI3KClassIII complex consisting of VPS34, VPS15, Beclin1/BECN1 and ATG14L.  
288 Emerging evidence suggests impaired autolysosome clearance in VPS15 deficient muscle and the  
289 muscle phenotype evocative of lysosomal myopathies<sup>53</sup>. A study by Nascimbeni et al., have shown  
290 that alterations in VPS15, VPS34 and BECN1 lead to impaired endosome and lysosomal  
291 maturation in Danon Disease and Glycogen Storage Disease (GSDII)<sup>54</sup>. In the current study, we  
292 found that the PI3KclassIII complex was disrupted in *mdx* muscle, with a significant decrease in  
293 ATG14L and VPS34, whereas VPS15 was found to be increased. Intriguingly, we also found  
294 reduced interaction of Beclin-ATG14L complex whereas Beclin-Bcl-2 complex formation, which  
295 is known to inhibit autophagic induction, is increased in *mdx* muscle. This indicates disruption in  
296 the formation of vesicle nucleation. During starvation, tubulin acetylation signals kinesin  
297 recruitment to the MTs, with subsequent JNK activation and phosphorylation of Bcl-2, which  
298 allows the release of Beclin from Beclin-Bcl-2 complexes to initiate autophagosome formation.

299 <sup>55</sup>. We found decreased JNK activation, likely due to reduced levels of the scaffolding protein JIP-  
300 1, in *mdx* muscles and reduced phosphorylation of Bcl-2 (S70), thus inhibiting Beclin-ATG14L  
301 association for vesicle nucleation. In addition, WIPI-1, which recruits lipid phosphatidylinositol-  
302 3 phosphate (PI3P) and mediates recruitment of the ATG5-12/16L1 complex and the LC3  
303 lipidation, was found to be reduced in skeletal muscle from *mdx* mice. Taken together, our data  
304 suggest that defects in autophagosome maturation is mediated by inhibition of the Kinesin-JIP-  
305 JNK pathway in dystrophic mice.

306 SNARE associated proteins play a major role in membrane-mediated events of autophagosome-  
307 lysosome fusion, another crucial step in autophagy process. Recent studies have highlighted the  
308 role of STX17-SNAP29-VAMP8 Q-SNARE tertiary complex in promoting autophagosome-  
309 lysosome fusion.<sup>19, 56</sup> We revealed that the blockage of autophagosome-lysosome fusion in *mdx*  
310 mice was not due to altered expressions of SNARE associated proteins but due to the inhibition of  
311 the interaction of STX17 and VAMP8 with SNAP29, which culminates in accumulation of  
312 autophagosomes<sup>7</sup>

313 Previous work from our lab has shown that genetic ablation of Nox2-ROS improved autophagy in  
314 *mdx* mice. Nevertheless, the detailed mechanisms by which autophagy was rescued in the *p47<sup>-/-</sup>*  
315 */mdx* mouse was not evaluated, which is required to improve the therapeutic outcomes for DMD  
316 patients. Our current data showed that *p47<sup>-/-</sup> /mdx* mice prevented the defects of autophagosome  
317 maturation by promoting vesicle nucleation and elongation of autophagosomes. However, our data  
318 revealed that genetic inhibition of Nox-2 was not able to promote the interaction between STX17-  
319 SNAP29 and VAMP8-SNAP29 and thus cannot promote autophagosome-lysosome fusion and  
320 content degradation in *mdx* mice. These finding may explain why we only observed partial rescue  
321 of dystrophic pathology in the *p47<sup>-/-</sup> /mdx* mouse<sup>7</sup> .

322 Based on the above findings, we speculate that autolysosome formation in *mdx* muscle is redox  
323 independent, leading us to explore the mechanisms that underlie the failure of delivery of  
324 autophagosomes and its fusion with lysosomes. Protein acetylation controls autolysosome  
325 formation and improves autophagic flux<sup>19, 39, 57</sup>. Emerging evidences suggests that HDAC2  
326 promotes autophagy by causing deacetylation of STX17, which increases its binding with SNAP29  
327 and promotes the Q-SNARE complex formation<sup>39</sup>. Interestingly, our findings revealed the  
328 deacetylation of STX17 and increased HDAC2 in *mdx* mice, which suggests that reduced  
329 interaction of STX17-SNAP29-VAMP complex is independent of the STX17 acetylation and  
330 HDAC2.

331 Previous studies from our lab and others have reported dystrophin deficiency results in  
332 disorganized MT lattice network and elevated MT tubulin modifications (detyrosinated  $\alpha$ -tubulin)  
333 in *mdx* muscle<sup>14,58</sup>. Post translational modifications of MTs, in particular acetylation, have been  
334 shown to facilitate autophagosome formation and serve to direct mature autophagosomes for  
335 fusion and degradation<sup>41, 59, 60</sup>. In the present study, we find decreased acetylated  $\alpha$ - tubulin in *mdx*  
336 mice, with increased protein expressions of the deacetylase enzyme, HDAC6. Accumulating  
337 evidence suggests that JIP-1 mediates and regulates the binding of cargo to the Kinesin-1 complex  
338 via KLC on the microtubule track. Activated JNK regulates the binding of cargo to KLC by  
339 mediating the release of cargo once they have reached the lysosomes for fusion. Ittner et al. have  
340 shown that impaired binding of JIP-1 to the kinesin-1 complex disrupted the anterograde axonal  
341 transport of cargo along MTs in Alzheimer's disease<sup>61</sup>. Surprisingly, in dystrophic muscle, JIP-1  
342 interacts with KLC and JNK, forming a KLC-JIP-JNK complex. We therefore speculate that  
343 decreased MT acetylation in *mdx* muscle can prevent the binding of KLC-JIP-JNK on the MT  
344 track, leading to inhibition of autophagosome transport and its fusion with lysosomes.

345 HDAC6 inhibition exerted beneficial effects by improving autophagic dysfunction through MT  
346 acetylation in several pathophysiological conditions such as, Huntington's disease (HD)<sup>27</sup>spinal  
347 cord injury<sup>19</sup>, osteoarthritis<sup>33</sup>, and doxorubicin-induced cardiomyopathy<sup>30</sup>. HDAC6 has unique  
348 structure and properties, exerting both enzymatic and non-enzymatic effects on cellular functions.  
349 In addition to two catalytic domains which deacetylates cytoplasmic non-histone proteins, it also  
350 possesses a non-enzymatic zinc-finger ubiquitin-binding domain (UBD) at its C-terminus<sup>62</sup>.  
351 Through its UBD, HDAC6 interacts with ubiquitinated protein aggregates to promote loading and  
352 transport along the microtubules for proper degradation. Given this dual role of HDAC6 in  
353 regulating the response to cellular stress, pharmacological inhibition of its enzymatic activity, as  
354 opposed to knock-down of protein content, has been shown to be a novel and promising therapeutic  
355 strategy for several diseases<sup>63</sup>. We selected TubA, which stands out as a potent and highly specific  
356 HDAC6 inhibitor with an IC<sub>50</sub> of 15 nM and has a strict selectivity for HDAC6 over all other  
357 HDACs (over 1000-fold) except for HDAC8 (57 folds)<sup>64</sup>. Unlike other HDAC inhibitors, TubA  
358 exhibits no toxicities such as fatigue, nausea, or thrombocytopenia, thus making HDAC6 a most  
359 suitable and promising therapeutic target<sup>64</sup>. We assessed TubA dosing in *mdx* cohorts at 30mg/kg  
360 every other day for 4weeks and did not observe any muscle functional recovery, although serum  
361 CPK levels were reduced. (**Fig.S6a-b**).We further assessed TubA dosing in *mdx* cohorts at  
362 70mg/kg every day for 2 weeks. Interestingly, TubA treatment at this dose showed improvement  
363 in muscle contractile properties and strength, and reduced serum CPK levels in *mdx mice*. Our data  
364 shows that HDAC6 inhibition specifically promoted tubulin acetylation without affecting DT-  
365 tubulin levels in *mdx* mice. However, HDAC6 inhibition was not able to activate JIP/JNK  
366 signaling as assessed by phospho-JNK and thus, autophagosome maturation was not improved in  
367 TubA treated *mdx*. HDAC6 inhibition was recently reported to restore neuronal autophagy flux by



368 increased LC3II and decreased p62 aggregates in neurodegenerative disorders<sup>27, 65</sup>. TubA  
369 treatment promoted the autophagosome-lysosome fusion by SNARE machinery in SCI<sup>19</sup>.  
370 Consistent with these findings, we found increased LC3II and reduced p62 aggregates, which  
371 indicates efficient autophagic clearance in TubA treated *mdx*. TubA treated *mdx* mice showed  
372 increased interaction of STX17 and VAMP8 with SNAP29, thus facilitating the fusion and  
373 formation of autolysosomes, as well as enhanced lysosomal function. Altogether, our data support  
374 a role for HDAC6 regulating autophagic flux by decreasing MT acetylation and inhibiting protein  
375 aggregate trafficking and fusion of autophagosome-lysosome in skeletal muscle from *mdx* mice,  
376 which is reversed upon HDAC6 inhibition with TubA.

377 HDAC6 may have a role in regulating redox balance within the cell, as HDAC6 has been shown  
378 to deacetylate redox regulatory proteins, PrxI and PrxII<sup>25</sup>; and once deacetylated PrxI and PrxII  
379 lose their antioxidant capacity. HDAC6 inhibition recovered acetylation of Prx and provided  
380 protection against oxidative stress in A $\beta$ -induced Alzheimer's disease (AD)<sup>24</sup>, 6-OHDA induced  
381 Parkinson's disease (PD) model<sup>29</sup>, and myocardial ischemia/reperfusion (MI/R)<sup>32</sup>, suggesting a  
382 new mechanism regulating redox balance. In the current study, our results showed that acetylation  
383 levels of PrxII were decreased in *mdx* muscle, and TubA treatment recovered both acetylation  
384 levels of PrxII and total PrxII in *mdx* mice. Our previous findings show that PrxII overexpression  
385 protects *mdx* mice from eccentric contraction induced force loss<sup>46</sup>. However, we did not observe  
386 any change in either oxidized PrxII (PrxSO<sub>2</sub>/3) or stretch dependent ROS production in *mdx* mice  
387 treated with TubA. Intriguingly, p47<sup>-/-</sup>/*mdx* mice showed reduced levels of oxidized PrxII  
388 (PrxSO<sub>2</sub>/3), increased PrxII acetylation, but did not increase MT acetylation. Thus, there appears  
389 to be cross-talk between HDAC6 and Nox2 in dystrophic skeletal muscle that we have yet to

390 understand, and doing so will be essential for developing effective therapeutics for maintaining  
391 muscle homeostasis in DMD patients.

392 Our data reveals that TubA has the potential to act on the downstream pathogenic events of  
393 dystrophia. TubA treatment attenuated apoptosis, decreased levels of CD68+ macrophages  
394 infiltrated into the muscle, maintained sarcolemmal integrity, and remarkably reduced serum CK  
395 levels in *mdx* mice. Quantitative analysis of Hematoxylin/eosin staining showed significant  
396 reduction in the centralized nuclei and increased CSA in TA *mdx* muscle following treatment with  
397 TubA. In DMD patients, even at very young ages, weakness in hand strength is observed as a  
398 generalized effect of dystrophin deficiency. Loss of grip strength was observed in *mdx* mice while  
399 TubA treated *mdx* mice showed significant improvement in muscle strength. Diaphragm is the  
400 most severely affected skeletal muscle in dystrophic mice, and diaphragm dysfunction is a major  
401 cause of respiratory failure in DMD patients. TubA-treated *mdx* mice showed significantly greater  
402 diaphragm force production and decreased ECC induced force loss. These findings indicate that  
403 HDAC6 inhibition not only restores autophagy flux by regulating MT acetylation but it extended  
404 its efficacy to alleviate many symptoms due to loss of dystrophin in DMD

405 In conclusion, our study suggests that defects in autophagy are regulated by both redox and  
406 acetylation modifications in *mdx* mice. Evidence provided in this study confirms the role of  
407 HDAC6 in deacetylating MTs, which led to the disruption of autophagosome-lysosome fusion in  
408 dystrophin deficient mice. HDAC6 inhibition holds the potential to counteract the alteration of the  
409 MTs and restore impaired autophagic flux in dystrophic skeletal muscle (**Fig.9**). This pre-clinical  
410 study suggests that targeting specific histone deacetylase, HDAC6 served as an effective tool in  
411 preventing disease progression and improving muscle strength and function (**Table 1**), supporting  
412 the translational potential of TubA into clinical research for DMD patients. In view of our data,

413 combinatorial therapeutic approaches are currently underway in our laboratory to assess the  
414 efficacy of TubA and Nox-2 pharmacological inhibitor in ameliorating pathological changes in  
415 DMD.

416

## 417 **Material and Methods**

### 418 **Antibodies and Reagents**

419 Tubastatin A and PEG300 were purchased from Selleck Chem, DCFH-DA (6-carboxy-2',7'-  
420 dichlorodihydrofluorescein diacetate) was from Invitrogen. DMSO and Evans Blue Dye were  
421 purchased from Sigma Aldrich. Tween-80 from Fischer Scientific. Protein A Magnetic Beads ,  
422 Mini-Protean TGX stain free gels, and Immun-Blot® PVDF Membrane, Clarity western ECL  
423 substrate were purchased from Bio-Rad. Anti-beclin, anti-p-bcl-2, anti-vps34, anti-vps15, anti-  
424 JNK, anti-p-JNK, anti-atg5-12, anti-atg7, anti-atg4b, anti- $\alpha$ -tubulin, anti-HDAC6, anti-p62, anti-  
425 caspase-3, and anti-LC3 antibodies were from Cell Signaling Technology. Anti-GAPDH  
426 (glyceraldehyde-3-phosphate dehydrogenase) and anti-dynein were purchased from EMD  
427 Millipore. Anti-CD68, anti-LAMP2, anti-Cathepsin-B, anti-SNAP29 were purchased from Santa  
428 Cruz Biotechnologies. Anti-WIP1, anti-snap29, anti-stx17, anti-vamp8, anti-KIF5B, anti-KLC,  
429 anti-detyrosinated, anti-Prx-SO3, and anti- $\alpha$ -laminin were from Abcam. Anti-acetylated tubulin,  
430 anti-bcl-2, anti-atg14, anti-MAPKK, anti-JIP-1, anti-prxII were from Millipore Sigma. Secondary  
431 antibodies for immunofluorescence (Alexa Fluor® 594 donkey anti-rabbit, Alexa Fluor® 488-  
432 donkey anti-rabbit, Alexa Fluor®594-goat anti-mouse), and ProLong™ Gold Antifade Mountant  
433 with DAPI were purchased from Invitrogen. Microscopic slides was purchased from Denville  
434 Scientific Inc. Detailed information about antibodies and dilution can be found in **Supplementary**  
435 **Table 1 and 2.**

### 436 **Mice**

437 C57BL/10ScSnJ (WT) and C57Bl/10ScSn-Dmdmdx/J (*mdx*) were purchased from Jackson  
438 Laboratories (Bar Harbor, ME) and bred following their breeding strategy. Mice with a genetic  
439 deletion of the Nox-2 scaffolding subunit p47<sup>phox</sup> (p47<sup>-/-</sup>) were obtained from The Jackson  
440 Laboratory (B6 (Cg)-Ncf1m1J/J) and bred onto the *mdx* background as previously described<sup>7</sup>. All  
441 animals used for experiments were males between 3-6 weeks of age. All animal studies were  
442 conducted in accordance with ARRIVE (Animal Research: Reporting of In Vivo Experiments).  
443 Mice were housed in a specific pathogen free (SPF) facility on a 12hr light/dark cycle. All mice  
444 were monitored daily and drug tolerability evaluated on the basis of body weight and clinical signs.  
445 After treatment period, mice were sacrificed by deep anesthesia followed by cervical dislocation  
446 as approved by the Institutional Animal Care and Use Committee (IACUC) of Baylor College of  
447 Medicine. Skeletal muscles were quickly excised, and either placed in Krebs-Ringer buffer for  
448 tissue experiments, snap frozen in liquid nitrogen for biochemical and molecular experiments, or  
449 in 10% formalin for histological experiments. We employed basic methods to analyze the  
450 preclinical experiments (TREAT-NMD)<sup>66</sup>

### 451 **HDAC6 Inhibitor treatment**

452 For pharmacological inhibition of HDAC6, HDAC6-Specific inhibitor TubastatinA (TubA)  
453 (Selleck-Chem, USA) was dissolved in 4% dimethyl sulfoxide (DMSO), 30% PEG300 and 66%  
454 MilliQ with a final concentration of 2.5 mg/mL, and was freshly prepared each day. TubA was  
455 intraperitoneally (*i.p.*) injected into 3 week-old *mdx* mice (onset of disease progression) at the  
456 dosage of 70 mg/kg b.w. once a day for 2 weeks.

#### 457 **Fore-limb Grip strength analysis**

458 Fore-limb grip strength was performed to assess the effects of TubA on recovery of muscle  
459 strength of *mdx* mice. The grip strength meter (Columbus Instruments, OH) was positioned  
460 horizontally and mice were held by the tail. Mice were allowed to grasp the smooth metal rod with  
461 their forelimbs only and then were pulled backward by the tail. The force applied to the metal rod  
462 at the moment the grasp was released and recorded as the peak tension. The test was repeated 5  
463 consecutive times within the same session and the average value from the 5 trials was recorded as  
464 the grip strength for that animal. In order to avoid modifications induced by the body weight of  
465 the mice in the latency of staying on the grip strength meter, the data have been normalized with  
466 body weight of mice. The grip strength test was conducted by the same investigator in order to  
467 avoid variability in performing experiment, and the investigator was blinded to the treatment  
468 group.

#### 469 **Serum Collection**

470 Blood was collected from the hepatic portal vein of mice immediately following sacrifice and left  
471 at room temperature for 30 min to achieve coagulation. Serum was then separated from other blood  
472 fractions by centrifugation at 1,000 g for 10 min and stored at  $-80^{\circ}\text{C}$  for further use. CK activity  
473 in the serum was measured using Creatine Kinase Activity Assay Kit (My BioSource) following  
474 the manufacturer's instruction.

#### 475 **Ex-Vivo EDL Eccentric force measurements**

476 Muscle contractile force measurement was conducted by using an *ex-vivo* muscle test system. In  
477 brief, the mice were anesthetized with isoflurane, the hind limb was excised and immediately  
478 placed in a bicarbonate-buffered solution (120 mM NaCl, 4 mM KCl, 1 mM  $\text{MgSO}_4$ , 1 mM  
479  $\text{NaH}_2\text{PO}_4$ , 25 mM  $\text{NaHCO}_3$ , and 2 mM  $\text{CaCl}_2$ , 10mM glucose) equilibrated with 95%  $\text{O}_2$ -5%  $\text{CO}_2$   
480 (pH7.4) for dissection. The proximal and distal tendons were tied with braided silk suture thread  
481 (4-0, Fine Science Tools) and mounted in a muscle bath containing bicarbonate-buffered solution  
482 continuously bubble with 95%  $\text{O}_2$ , 5%  $\text{CO}_2$  between a fixed hook and a dual-mode lever system  
483 (305C-LR-FP, Aurora Scientific Inc., Aurora, ON, Canada) and allowed to equilibrate to  $30^{\circ}\text{C}$  for  
484 10 minutes. The stimulation protocol consisted of supramaximal electrical current delivered  
485 through platinum electrodes using a biphasic high-power stimulator (701C; Aurora Scientific).  
486 Optimum length ( $L_0$ ) was determined with a series of twitch stimulations measured using a hand-

487 held electronic caliper, after which the muscle underwent 10 eccentric contraction with 3 minutes  
488 rest between each contraction so as to not elicit muscle fatigue. Each eccentric contraction  
489 consisted of a 200 ms isometric tetanus (150Hz) followed by stretch from 100% to 110% of Lo at  
490 0.5Lo/s and then shortened to Lo passively. Following the 10 eccentric contractions the muscle  
491 was removed from the organ bath, trimmed of connective tissue, blotted dry, and weighed. Data  
492 were analyzed using the dynamic muscle control and analysis software (Aurora Scientific Inc.).

### 493 **Ex-Vivo Diaphragm Isometric force measurements**

494 Diaphragm (DIA) muscle was dissected from mice and one end tied to a fixed hook and the other  
495 to a force transducer (F30, Harvard Apparatus) using silk suture (4-0) in bicarbonate-buffered  
496 solution continuously gassed with 95% O<sub>2</sub>-5% CO<sub>2</sub> at 30°C. Contractile properties were assessed  
497 by passing a current between two platinum electrodes at supramaximal voltage (PanLab LE 12406,  
498 Harvard Apparatus) with pulse and train durations of 0.5 and 250 ms, respectively. Muscle length  
499 was adjusted to elicit maximum twitch force (optimal length, Lo) and the muscle was allowed a  
500 10-min equilibration period. To define the force-frequency characteristics, force was measured at  
501 stimulation frequencies of 1, 5, 10, 20, 40, 60, 80, 120, 150 and 200 Hz every 1 min. At the end of  
502 the contractile protocol, muscle length was measured using a hand-held electronic caliper, fiber  
503 bundles removed from the organ bath and trimmed of excess bone and connective tissue, blotted  
504 dry and weighed. Muscle weight and Lo were used to calculate normalized forces expressed as  
505 N/cm<sup>2</sup>

### 506 **ROS measurements**

507 Diaphragm intracellular ROS was measured using 6-carboxy-20,70-dichlorodihydrofluorescein  
508 diacetate (DCFH-DA) (Invitrogen, Carlsbad, CA) as previously described<sup>14</sup> Briefly, diaphragm  
509 muscle optimal length was determined as described above followed by incubation with DCFH-  
510 DA for 30 min, washed using the physiological saline solution and de-esterified for an additional  
511 30 min at 25°C. All cell-loading and imaging was performed in the dark to prevent light induced  
512 oxidation of DCFH-DA. DCF was excited at 470/20 nm using a Sutter Lamda DG-5 Ultra-high-  
513 speed wavelength switcher and emission intensity was collected at 535/48 nm on a charge coupled  
514 device (CCD) Camera (CoolSNAP MYO, Photometrics, Tucson, AZ) attached to an Axio  
515 Observer (Zeiss) inverted microscope (20X objective, 0.5 NA) at a rate of 0.2 Hz. Alterations in  
516 the rate of ROS production were baseline corrected and calculated over the final minute of the  
517 stretch period.

### 518 **Western blotting and Immunoprecipitation**

519 TA muscle from hind limb of the mice were isolated and lysed with ice-cold RIPA buffer  
520 containing protease and phosphatase inhibitors, and centrifuged at 13,500rpm for 10 min. The  
521 supernatant was retained, aliquoted, and the protein content was quantified using the bicinchoninic

522 acid (BCA) Assay Kit. A volume corresponding to 10  $\mu\text{g}$  of protein was diluted with a Laemmli  
523 sample buffer (BioRad), and heated at 100 °C for 5 min. Protein samples were separated via 4-  
524 15% and 4-20% SDS-PAGE and then transferred to polyvinylidene difluoride (PVDF)  
525 membranes, which were blocked with 5% non-fat milk or 5% BSA (dissolved in Tris-buffered  
526 saline, pH 7.4, and 0.2% Tween 20, TBST) for 60 min at room temperature.

527 For immunoprecipitation, total protein lysates were prepared and quantified as described above.  
528 Protein lysates (1000 $\mu\text{g}$ ) were incubated with protein A magnetic beads (BioRad) as per the  
529 manufacturer's instructions. Protein complexes were analyzed by western blotting using indicated  
530 antibodies (Beclin-1, ATG14L, Bcl-2, JIP-1, JNK, KIF5B, KLC, SNAP29, VAMP8, STX17,  
531 Prx2, acetyl lysine). Immunoblots were incubated overnight at 4 °C with primary antibodies. The  
532 following day, membranes were washed and incubated with secondary antibodies for 60min at  
533 room temperature. Clarity western ECL substrate (Bio-Rad) was added on the membrane and the  
534 signals were visualized by ChemiDoc Imaging system (Bio-Rad). The bands were quantified using  
535 densitometric analysis by the ImageLab Software.

## 536 **Histology and Immunofluorescence**

537 The skeletal muscles (TA and GAS) were carefully excised from hind limb of mice and post-fixed  
538 in 10% formalin overnight. Paraffin blocks were then prepared after dehydration, clearing, and wax  
539 impregnation. Transverse Sections (T.S.) of 4 $\mu\text{m}$  thickness were cut with a rotary microtome,  
540 deparaffinized in xylene and gradient of alcohol were subjected to histological or  
541 immunofluorescence staining.

542 For H&E staining, the slides were stained in hematoxylin solution for 20–30 min and rinsed in  
543 running water three times. Slides were then stained in eosin solution for 1–2 min, dehydrated in  
544 graded ethanol and xylene, and covered using DPX paramount for further imaging. For  
545 immunofluorescence, serial muscle cross-section (4 $\mu\text{m}$ ) were cut from each paraffin block by  
546 rotatory microtome. The sections were placed on coated slides (Denville Scientific Inc.) and dried  
547 at 60 °C in a hot air oven. Sections were deparaffinized, rehydrated, and underwent an antigen  
548 retrieval method using citrate-EDTA solution incubated at 96 °C for 20 min in water bath. After  
549 dipping the slide in distilled water, the sections were blocked with 3% BSA for 60min at room  
550 temperature, and incubated with the primary antibodies overnight at 4°C followed by secondary  
551 antibodies at room temperature for 1 h. Primary antibodies include SNAP29, VAMP8, CD68, and  
552  $\alpha$ -laminin. Secondary antibodies include Alexa Fluor 488 and 594. Tissue sections were mounted  
553 with Prolonged Gold Antifade with DAPI (Invitrogen). All images were taken with Fluorescent  
554 microscope (ECHO, CA) and analysis was carried out by ImageJ software.

555 For CD68 quantification, images acquired from five different optical fields of GAS muscle cross-  
556 section (40X magnification) and the number of CD68+ immune cells were counted per area ( $\mu\text{m}^2$ ).

557 The CSA and centralized nuclei were measured based on  $\alpha$ -laminin staining and DAPI stained  
558 nuclei respectively. CSA was quantified by minimum Feret's diameter and central nucleation was  
559 quantified as % fibers with central nuclei. TA muscle cross-sections were used for quantification.  
560 All the immunofluorescence images were quantified using Image J software (NIH, USA).

### 561 **Colocalization analysis**

562 For double immunofluorescence, two primary antibodies (SNAP29 and VAMP8) were incubated  
563 on the same gastrocnemius (GAS) tissue sections. To quantify the degree of colocalization  
564 between the anti- SNAP29 and anti-VAMP8 staining, Pearson's correlation coefficient was  
565 performed using ImageJ Software.

### 566 **RNA extraction and Gene expression analysis**

567 Total RNAs were extracted from gastrocnemius (GAS) muscles using TRIzol reagent (Invitrogen)  
568 according to the manufacturer's protocol. Gene expression was verified by using cDNA synthesis  
569 kit (Company name) for reverse transcription and Real Mastermix for PCR following  
570 manufacturer's instructions. The primers used were as follows:

571 BECN1-FWD (5' AGG CTG AGG CGG AGA GAT T-3'),

572 BECN1-REV (5'- TCC ACA CTC TTG AGT TCG TCA T-3');

573 ATG5-FWD (5'-ATCAGACCACGACGGAGCGG-3'),

574 ATG5-REV (5'-GGCGACTGCGGAAGGACAGA-3');

575 ATG12-FWD (5'- ACAAAGAAATGGGCTGTGGAGC-3'),

576 ATG12-REV (5'- GCAGTAATGCAGGACCAGTTTACC-3');

577 ATG14L-FWD (5'- GCAGCTCGTCAACATTGTGT-3'),

578 ATG14L-REV (5'-TGCGTTCAGTTTCCTCACTG-3');

579 VPS34-FWD(5'-TGTCAGATGAGGAGGCTGTG-3'),

580 VPS34-REV(5'-CCAGGCACGACGTAACCTTCT-3');

581 GABARAPL1-FWD (5'- CGGTCATCGTGGAGAAGGCT-3'),

582 GABARAPL1-REV (5'- CCAGAACAGTATAACGGCAACTCC-3');

583 FIP200-FWD(5'-ACCGTGCACCTGCTATTCCT-3'),



584 FIP200-REV (5' CATCATGGACAAGCCCTTCA-3');  
585 UVRAG-FWD (5' CAA GCT GAC AGA AAA GGA GCG AG-3'),  
586 UVRAG-REV (5'- GGA AGA GTT TGC CTC AAG TCT GG-3');  
587 HDAC6-FWD(5'-AAGTGGAAGAAGCCGTGCTA-3'),  
588 HDAC6-REV (5'- CTCCAGGTGACACATGATGC -3')';  
589 MEC17/ATAT1-FWD (5'- ACTGA AGGAC ACCTC AGCCC GA -3'),  
590 MEC17/ATAT1-REV(5'- TACCT CATTG TGAGC CTCCC GG-3')

### 591 **Evan's Blue Dye uptake**

592 To assess the membrane integrity of WT, *mdx*, and TubA treated *mdx* mice, Evans Blue Dye (EBD)  
593 was injected to the animal as described by Millay et al <sup>67</sup>. EBD (10mg/ml) was dissolved in PBS  
594 (pH 7.4) and sterilized by passage through membrane filters with a 0.2-mm pore size. Mice were  
595 injected intraperitoneal (*i.p.*), with 0.1 ml/10g body weight with EBD 24h prior to the completion  
596 of two week treatment with TubA. After 24h, DIA muscles were harvested from all the mice  
597 groups and sectioned using rotatory microtome. EBD positive fibers showed a bright red emission  
598 under fluorescent microscope. All sections were examined, photographed and muscle fiber  
599 counted under a fluorescence microscope (ECHO, CA).

### 600 **TUNEL ASSAY**

601 GAS isolated from hind limb of mice fixed in 4% formalin overnight and then paraffin-embedded  
602 muscles sections (4µm) were assessed by terminal deoxynucleotidyltransferase-mediated dUTP  
603 nick end labeling (TUNEL) assay with an in situ Cell Death Detection Kit (Biovision Inc., CA,  
604 USA) as per the manufacturer's instructions. Antigen retrieval was performed and slides were then  
605 blocked in 3% bovine serum albumin for 1hr at RT and incubated in anti-α-laminin overnight at  
606 4°C. The following day, slides were incubated in donkey anti-rabbit AF594 and then stained with  
607 Prolong gold antifade reagent with DAPI (Invitrogen).Tissue sections were examined under  
608 fluorescence microscope (ECHO, CA). TUNEL positive nuclei were counted manually as a co-  
609 localization of TUNEL + nuclei with DAPI and expressed as a percentage of the TUNEL + nuclei  
610 per total number of DAPI stained nuclei obtained from five different optical field per muscle  
611 section (40X Magnification). Total number of DAPI stained nuclei were counted using Image J  
612 software (NIH).

### 613 **Statistical analysis**

614

615 Statistical analysis were performed using Origin Pro Software (OriginLab Corporation,  
616 Northhampton, MA, USA). Differences between two groups were analyzed using Student's *t*-tests  
617 and normality tests. Differences between means of multiple groups were analyzed by one or two-  
618 way analysis of variance *ANOVA* followed with Tukey *post-hoc* tests. Values of  $p < 0.05$  (95%  
619 confidence) were considered statistically significant. Data are represented by box plots with mean  
620 (empty checker box within the box), median (solid bar), SD (whisker), SE (box). The number of  
621 mice used in groups for each parameter are indicated in figure legends. Recovery index ( $RI_{TubA}$ )  
622 was calculated as  $((mdx+TubA)-(mdx))/((WT)-(mdx)) \times 100$ <sup>66</sup>.

623

## 624 References

- 625 1. Himic, V. & Davies, K.E. Evaluating the potential of novel genetic approaches for the treatment  
626 of Duchenne muscular dystrophy. *Eur J Hum Genet* (2021).
- 627 2. Duan, D., Goemans, N., Takeda, S., Mercuri, E. & Aartsma-Rus, A. Duchenne muscular dystrophy.  
628 *Nat Rev Dis Primers* **7**, 13 (2021).
- 629 3. Min, Y.-L. *et al.* CRISPR-Cas9 corrects Duchenne muscular dystrophy exon 44 deletion mutations  
630 in mice and human cells. *Science Advances* **5**, eaav4324 (2019).
- 631 4. Porter, G.A., Dmytrenko, G.M., Winkelmann, J.C. & Bloch, R.J. Dystrophin colocalizes with beta-  
632 spectrin in distinct subsarcolemmal domains in mammalian skeletal muscle. *The Journal of cell*  
633 *biology* **117**, 997-1005 (1992).
- 634 5. Spinazzola, J.M. & Kunkel, L.M. Pharmacological therapeutics targeting the secondary defects  
635 and downstream pathology of Duchenne muscular dystrophy. *Expert Opin Orphan Drugs* **4**,  
636 1179-1194 (2016).
- 637 6. Khairallah, R.J. *et al.* Microtubules underlie dysfunction in duchenne muscular dystrophy.  
638 *Science signaling* **5**, ra56 (2012).
- 639 7. Pal, R. *et al.* Src-dependent impairment of autophagy by oxidative stress in a mouse model of  
640 Duchenne muscular dystrophy. *Nature Communications* **5**, 4425 (2014).
- 641 8. Boya, P., Reggiori, F. & Codogno, P. Emerging regulation and functions of autophagy. *Nature Cell*  
642 *Biology* **15**, 713-720 (2013).
- 643 9. De Palma, C. *et al.* Autophagy as a new therapeutic target in Duchenne muscular dystrophy. *Cell*  
644 *Death Dis* **3**, e418 (2012).
- 645 10. Whitehead, N.P. *et al.* Validation of ultrasonography for non-invasive assessment of diaphragm  
646 function in muscular dystrophy. *The Journal of physiology* **594**, 7215-7227 (2016).
- 647 11. Prins, K.W. *et al.* Dystrophin is a microtubule-associated protein. *The Journal of cell biology* **186**,  
648 363-369 (2009).
- 649 12. Belanto, J.J. *et al.* Microtubule binding distinguishes dystrophin from utrophin. *Proceedings of*  
650 *the National Academy of Sciences* **111**, 5723-5728 (2014).
- 651 13. Percival, J.M. *et al.* rAAV6-microdystrophin rescues aberrant Golgi complex organization in mdx  
652 skeletal muscles. *Traffic (Copenhagen, Denmark)* **8**, 1424-1439 (2007).
- 653 14. Loehr, J.A. *et al.* NADPH oxidase mediates microtubule alterations and diaphragm dysfunction in  
654 dystrophic mice. *Elife* **7**, e31732 (2018).
- 655 15. Kerr, J.P. *et al.* Detyrosinated microtubules modulate mechanotransduction in heart and skeletal  
656 muscle. *Nature communications* **6**, 8526-8526 (2015).
- 657 16. Nelson, D.M. *et al.* Variable rescue of microtubule and physiological phenotypes in mdx muscle  
658 expressing different miniaturized dystrophins. *Human molecular genetics* **27**, 2090-2100 (2018).
- 659 17. Mackeh, R. *et al.* Reactive oxygen species, AMP-activated protein kinase, and the transcription  
660 cofactor p300 regulate  $\alpha$ -tubulin acetyltransferase-1 ( $\alpha$ TAT-1/MEC-17)-dependent microtubule  
661 hyperacetylation during cell stress. *J Biol Chem* **289**, 11816-11828 (2014).
- 662 18. Hać, A., Pierzynowska, K. & Herman-Antosiewicz, A. S6K1 Is Indispensible for Stress-Induced  
663 Microtubule Acetylation and Autophagic Flux. *Cells* **10**, 929 (2021).
- 664 19. Zheng, Z. *et al.* Histone deacetylase 6 inhibition restores autophagic flux to promote functional  
665 recovery after spinal cord injury. *Experimental Neurology* **324**, 113138 (2020).
- 666 20. Matsuyama, A. *et al.* In vivo destabilization of dynamic microtubules by HDAC6-mediated  
667 deacetylation. *The EMBO journal* **21**, 6820-6831 (2002).
- 668 21. Seto, E. & Yoshida, M. Erasers of histone acetylation: the histone deacetylase enzymes. *Cold*  
669 *Spring Harb Perspect Biol* **6**, a018713-a018713 (2014).

- 670 22. Bettica, P. *et al.* Histological effects of givinostat in boys with Duchenne muscular dystrophy.  
671 *Neuromuscular disorders : NMD* **26**, 643-649 (2016).
- 672 23. Hubbert, C. *et al.* HDAC6 is a microtubule-associated deacetylase. *Nature* **417**, 455-458 (2002).
- 673 24. Choi, H. *et al.* Increased acetylation of Peroxiredoxin1 by HDAC6 inhibition leads to recovery of  
674 A $\beta$ -induced impaired axonal transport. *Molecular Neurodegeneration* **12**, 23 (2017).
- 675 25. Parmigiani, R.B. *et al.* HDAC6 is a specific deacetylase of peroxiredoxins and is involved in redox  
676 regulation. *Proceedings of the National Academy of Sciences* **105**, 9633-9638 (2008).
- 677 26. Cosenza, M. & Pozzi, S. The Therapeutic Strategy of HDAC6 Inhibitors in Lymphoproliferative  
678 Disease. *Int J Mol Sci* **19**, 2337 (2018).
- 679 27. Guedes-Dias, P. *et al.* HDAC6 inhibition induces mitochondrial fusion, autophagic flux and  
680 reduces diffuse mutant huntingtin in striatal neurons. *Biochimica et Biophysica Acta (BBA) -*  
681 *Molecular Basis of Disease* **1852**, 2484-2493 (2015).
- 682 28. Yan, S. *et al.* Pharmacological Inhibition of HDAC6 Attenuates NLRP3 Inflammatory Response  
683 and Protects Dopaminergic Neurons in Experimental Models of Parkinson's Disease. *Frontiers in*  
684 *Aging Neuroscience* **12** (2020).
- 685 29. Jian, W. *et al.* Inhibition of HDAC6 increases acetylation of peroxiredoxin1/2 and ameliorates 6-  
686 OHDA induced dopaminergic injury. *Neuroscience Letters* **658**, 114-120 (2017).
- 687 30. Song, R. *et al.* HDAC6 inhibition protects cardiomyocytes against doxorubicin-induced acute  
688 damage by improving  $\alpha$ -tubulin acetylation. *Journal of molecular and cellular cardiology* **124**, 58-  
689 69 (2018).
- 690 31. Saito, S. *et al.* Tubastatin ameliorates pulmonary fibrosis by targeting the TGF $\beta$ -PI3K-Akt  
691 pathway. *PloS one* **12**, e0186615 (2017).
- 692 32. Leng, Y. *et al.* Inhibition of HDAC6 Activity Alleviates Myocardial Ischemia/Reperfusion Injury in  
693 Diabetic Rats: Potential Role of Peroxiredoxin 1 Acetylation and Redox Regulation. *Oxidative*  
694 *Medicine and Cellular Longevity* **2018**, 9494052 (2018).
- 695 33. Shen, Z. *et al.* Inhibition of HDAC6 by Tubastatin A reduces chondrocyte oxidative stress in  
696 chondrocytes and ameliorates mouse osteoarthritis by activating autophagy. *Aging (Albany NY)*  
697 **13**, 9820-9837 (2021).
- 698 34. Shi, Y. *et al.* Inhibition of HDAC6 protects against rhabdomyolysis-induced acute kidney injury.  
699 *American Journal of Physiology-Renal Physiology* **312**, F502-F515 (2017).
- 700 35. Tsuboyama, K. *et al.* The ATG conjugation systems are important for degradation of the inner  
701 autophagosomal membrane. *Science* **354**, 1036-1041 (2016).
- 702 36. Menon, M.B. & Dhamija, S. Beclin 1 Phosphorylation – at the Center of Autophagy Regulation.  
703 *Frontiers in Cell and Developmental Biology* **6** (2018).
- 704 37. Geeraert, C. *et al.* Starvation-induced hyperacetylation of tubulin is required for the stimulation  
705 of autophagy by nutrient deprivation. *J Biol Chem* **285**, 24184-24194 (2010).
- 706 38. Wang, Y. *et al.* SNARE-mediated membrane fusion in autophagy. *Semin Cell Dev Biol* **60**, 97-104  
707 (2016).
- 708 39. Shen, Q. *et al.* Acetylation of STX17 (syntaxin 17) controls autophagosome maturation.  
709 *Autophagy* **17**, 1157-1169 (2021).
- 710 40. Köchl, R., Hu, X.W., Chan, E.Y. & Tooze, S.A. Microtubules facilitate autophagosome formation  
711 and fusion of autophagosomes with endosomes. *Traffic (Copenhagen, Denmark)* **7**, 129-145  
712 (2006).
- 713 41. Xie, R., Nguyen, S., McKeenan, W.L. & Liu, L. Acetylated microtubules are required for fusion of  
714 autophagosomes with lysosomes. *BMC Cell Biol* **11**, 89 (2010).
- 715 42. Akella, J.S. *et al.* MEC-17 is an  $\alpha$ -tubulin acetyltransferase. *Nature* **467**, 218-222 (2010).
- 716 43. Verhey, K.J. & Hammond, J.W. Traffic control: regulation of kinesin motors. *Nature reviews.*  
717 *Molecular cell biology* **10**, 765-777 (2009).

- 718 44. Hirokawa, N. & Takemura, R. Molecular motors and mechanisms of directional transport in  
719 neurons. *Nature reviews. Neuroscience* **6**, 201-214 (2005).
- 720 45. Reagan-Shaw, S., Nihal, M. & Ahmad, N. Dose translation from animal to human studies  
721 revisited. *FASEB journal : official publication of the Federation of American Societies for*  
722 *Experimental Biology* **22**, 659-661 (2008).
- 723 46. Olthoff, J.T. *et al.* Loss of peroxiredoxin-2 exacerbates eccentric contraction-induced force loss in  
724 dystrophin-deficient muscle. *Nature Communications* **9**, 5104 (2018).
- 725 47. Rhee, S.G. Overview on Peroxiredoxin. *Molecules and cells* **39**, 1-5 (2016).
- 726 48. Stoughton, W.B., Li, J., Balog-Alvarez, C. & Kornegay, J.N. Impaired autophagy correlates with  
727 golden retriever muscular dystrophy phenotype. *Muscle & nerve* **58**, 418-426 (2018).
- 728 49. Iannotti, F.A. *et al.* Effects of non-euphoric plant cannabinoids on muscle quality and  
729 performance of dystrophic mdx mice. *Br J Pharmacol* **176**, 1568-1584 (2019).
- 730 50. Whitehead, N.P. Enhanced autophagy as a potential mechanism for the improved physiological  
731 function by simvastatin in muscular dystrophy. *Autophagy* **12**, 705-706 (2016).
- 732 51. Segatto, M. *et al.* BETs inhibition attenuates oxidative stress and preserves muscle integrity in  
733 Duchenne muscular dystrophy. *Nat Commun* **11**, 6108 (2020).
- 734 52. Nowosad, A. *et al.* p27 controls autophagic vesicle trafficking in glucose-deprived cells via the  
735 regulation of ATAT1-mediated microtubule acetylation. *Cell Death & Disease* **12**, 481 (2021).
- 736 53. Nemazany, I. *et al.* Defects of Vps15 in skeletal muscles lead to autophagic vacuolar myopathy  
737 and lysosomal disease. *EMBO molecular medicine* **5**, 870-890 (2013).
- 738 54. Nascimbeni, A.C., Fanin, M., Angelini, C. & Sandri, M. Autophagy dysregulation in Danon disease.  
739 *Cell Death & Disease* **8**, e2565-e2565 (2018).
- 740 55. Wei, Y., Patingre, S., Sinha, S., Bassik, M. & Levine, B. JNK1-mediated phosphorylation of Bcl-2  
741 regulates starvation-induced autophagy. *Mol Cell* **30**, 678-688 (2008).
- 742 56. Guo, B. *et al.* O-GlcNAc-modification of SNAP-29 regulates autophagosome maturation. *Nature*  
743 *Cell Biology* **16**, 1215-1226 (2014).
- 744 57. Cheng, X. *et al.* Pacer Is a Mediator of mTORC1 and GSK3-TIP60 Signaling in Regulation of  
745 Autophagosome Maturation and Lipid Metabolism. *Mol Cell* **73**, 788-802.e787 (2019).
- 746 58. Belanto, J.J. *et al.* Independent variability of microtubule perturbations associated with  
747 dystrophinopathy. *Human molecular genetics* **25**, 4951-4961 (2016).
- 748 59. Fass, E., Shvets, E., Degani, I., Hirschberg, K. & Elazar, Z. Microtubules support production of  
749 starvation-induced autophagosomes but not their targeting and fusion with lysosomes. *J Biol*  
750 *Chem* **281**, 36303-36316 (2006).
- 751 60. Liu, J. *et al.* Key Role of Microtubule and Its Acetylation in a Zinc Oxide Nanoparticle-Mediated  
752 Lysosome-Autophagy System. *Small (Weinheim an der Bergstrasse, Germany)* **15**, e1901073  
753 (2019).
- 754 61. Ittner, L.M., Ke, Y.D. & Götz, J. Phosphorylated Tau interacts with c-Jun N-terminal kinase-  
755 interacting protein 1 (JIP1) in Alzheimer disease. *The Journal of biological chemistry* **284**, 20909-  
756 20916 (2009).
- 757 62. Seigneurin-Berny, D. *et al.* Identification of components of the murine histone deacetylase 6  
758 complex: link between acetylation and ubiquitination signaling pathways. *Molecular and cellular*  
759 *biology* **21**, 8035-8044 (2001).
- 760 63. Batchu, S.N., Brijmohan, A.S. & Advani, A. The therapeutic hope for HDAC6 inhibitors in  
761 malignancy and chronic disease. *Clinical science* **130**, 987-1003 (2016).
- 762 64. Butler, K.V. *et al.* Rational Design and Simple Chemistry Yield a Superior, Neuroprotective HDAC6  
763 Inhibitor, Tubastatin A. *Journal of the American Chemical Society* **132**, 10842-10846 (2010).
- 764 65. Maday, S. & Holzbaur, Erika L.F. Autophagosome Biogenesis in Primary Neurons Follows an  
765 Ordered and Spatially Regulated Pathway. *Developmental Cell* **30**, 71-85 (2014).

- 766 66. Willmann, R. *et al.* Enhancing translation: guidelines for standard pre-clinical experiments in  
767 mdx mice. *Neuromuscular disorders : NMD* **22**, 43-49 (2012).  
768 67. Millay, D.P. *et al.* Calcium influx is sufficient to induce muscular dystrophy through a TRPC-  
769 dependent mechanism. *Proc Natl Acad Sci U S A* **106**, 19023-19028 (2009).

770

771

772

773

774

775

776

777

778

779

780

781

782

783

784

785

786

787 **Acknowledgement:** Research reported in this publication was supported by the National Institute  
788 of Arthritis and Musculoskeletal and Skin Diseases of the National Institutes of Health under  
789 Award Number RO1AR061370 and a Mrs. Clifford Elder White Graham Endowed Research Fund  
790 Awarded to G.G.R.

791 **Author Contributions:** A.A. and G.G.R conceived and design the experiments; A.A. performed  
792 the experiments, analyzed data and wrote the manuscript; E.L.C. and G.G.R. performed ex-vivo  
793 muscle contractility experiments; C.L.C. performed stretch induce ROS experiment; B.A.C  
794 processed co-localization data. G.G.R. edited the final manuscript. All authors reviewed, edited  
795 and approved the final version of manuscript.

796 **Competing Financial Interest:** The authors declare no competing financial interest

797 **Material and Correspondence-** Correspondence to George G Rodney (Rodney@bcm.edu)

798

799

800

801

802

803

804

805

806

807 **Table 1. Recovery Index for Tubastatin A treatment of mdx.**

| <b>Outcome Measures</b>                                  | <b>Recovery Score by TubA (70mg /kg b.w. for 2 weeks) in <i>mdx</i> mice</b> |
|----------------------------------------------------------|------------------------------------------------------------------------------|
| Serum Creatine phosphokinase (CPK)                       | 133.8%                                                                       |
| Immune Infiltration (CD68 <sup>+</sup> cells)            | 63.10%                                                                       |
| Centralized nuclei                                       | 52.2%                                                                        |
| Apoptotic cell death                                     | 92.14%                                                                       |
| EDL ECC force production at 10 <sup>th</sup> contraction | 46.68%                                                                       |
| Diaphragm Isometric force production (200Hz)             | 53.24%                                                                       |
| Grip Strength normalized with Body weight                | 113.29%                                                                      |

808

809

810

811

812

813

814

815

816



## 817 Figure Legends

818

819 **Fig. 1 Impaired autophagosomal biogenesis/maturation in *mdx* mice (a-b)** Immunoblot and  
820 densitometry analysis for autophagy regulatory proteins involved in vesicle nucleation (n=6 per  
821 group) and (ATG14L; WT, n = 6; *mdx*, n = 5). (c) Skeletal muscle tissue lysate prepared and  
822 subjected to immunoprecipitation using anti-Beclin, and the associated ATG14L, and Bcl-2 were  
823 determined using immunoblotting (n=3 per group). (d-e) JIP-1/JNK signaling was detected by  
824 immunoblot with antibodies as indicated (n = 6 per group) and (p-Bcl-2; WT, n=6; *mdx*,n=5).  
825 Densitometry analysis of immunoblots represented by box plots. (f-g) Immunoblot for proteins  
826 involved in autophagosome maturation and elongation (WT, n = 6; *mdx*, n = 5). Densitometry  
827 analysis of immunoblot represented by graph. GAPDH served as a loading control. Statistical  
828 difference between two groups were determined using two-sample student-*t*-test and Welch's  
829 correction test was performed for non-equal variance between two groups.

830 **Fig. 2 Impairment in the SNARE complex-mediated autophagosomal-lysosomal fusion in**  
831 ***mdx* mice (a-b)** Protein expressions of SNARE tertiary complex-STX17, VAMP8, and SNAP29  
832 was determined by immunoblot (WT, n = 6; *mdx*, n = 5). Densitometry analysis of immunoblot  
833 represented by box plots. (c) Skeletal muscle lysate was prepared and subjected to  
834 immunoprecipitation using anti-SNAP29, and the associated SNAP29, STX17, ATG14L, and  
835 VAMP8 were determined using immunoblotting (n=3 per group). GAPDH served as a loading  
836 control. Statistical difference between two groups were determined using two-sample student-*t*-test  
837 and Welch's correction test was performed for non-equal variance between two groups.

838 **Fig. 3 Genetic ablation of p47<sup>phox</sup> promotes autophagosomal maturation in *mdx* mice (a)**  
839 Skeletal muscle lysate was prepared from muscles of WT, *mdx* and p47<sup>-/-</sup>-*mdx* mice and subjected  
840 to immunoprecipitation using anti-Beclin, and the associated ATG14L, and Bcl-2 were determined  
841 using immunoblotting. Immunoblot for WT and *mdx* group are the same as shown in **Fig.1c**. (b-  
842 c) Immunoblot for JIP-1/JNK signaling proteins which participates in vesicle nucleation.  
843 Densitometry analysis of western blots represented by box plots (d-e) Protein expressions of  
844 autophagosome elongation marker, ATG5-12 was determined by western blot. Densitometry  
845 analysis of western blot represented by box plots. (f) Skeletal muscle tissue lysate was prepared  
846 from muscles of WT, *mdx* and p47<sup>-/-</sup>-*mdx* mice and subjected to immunoprecipitation using anti-  
847 SNAP29, and the associated SNAP29, STX17, ATG14L, and VAMP8 were determined using  
848 immunoblotting. Immunoblot for WT and *mdx* group are the same as shown in **Fig.2c**. (g-h)  
849 Immunoblots of lysosomal proteins, LAMP2 and Cathepsin-B. Densitometry analysis of western  
850 blot represented by box plots. GAPDH served as a loading control. (n=3 per group in all the figure  
851 panels). Statistical difference between groups were determined using ANOVA with Tukey's *post*  
852 *hoc* test.

853 **Fig.4. Altered tubulin-acetylation in *mdx* muscle (a-b)** Protein expressions of  $\alpha$ -tubulin,  
854 acetylated- $\alpha$ -tubulin, HDAC6 were determined by western blot (n=6 per group). Densitometry  
855 analysis of immunoblot represented by box plots. (c-d) Protein expressions of MTs motor proteins,  
856 kinesin-1 complex (KIF5B, KLC) and dynein were determined by western blotting. WT and *mdx*  
857 mice (n=6 per group). Densitometry analysis of immunoblot represented by box plots (e) Skeletal  
858 muscle tissue lysate was prepared and subjected to immunoprecipitation using anti-JIP-1, and the  
859 associated KIF5B, KLC, and JNK were determined using immunoblotting (n=3 per group). (f-g)

860 Protein expressions of  $\alpha$ -tubulin, acetylated- $\alpha$ -tubulin, HDAC6 were determined by western blot in  
861 *mdx* and p47<sup>-/-</sup>/*mdx* mice (n=3 per group). GAPDH as a loading control. Statistical difference  
862 between two groups were determined using two-sample student-*t*-test.

863 **Fig. 5 HDAC6 inhibition promotes tubulin acetylation and recovers autophagic flux in *mdx***  
864 **mice (a-b)** Protein expressions of  $\alpha$ -tubulin, acetylated- $\alpha$ -tubulin, detyrosinated  $\alpha$ -tubulin, and  
865 HDAC6 were determined by western blot in WT, *mdx* and TubA treated *mdx* mice (n=3 per group).  
866 Densitometry analysis of immunoblot represented by box plots. **(c-d)** Immunoblot for autophagy  
867 related proteins- p62 and LC3 (n = 3 per group). Densitometry analysis of western blots  
868 represented by box plots. **(e)** Skeletal muscle lysate was prepared and subjected to  
869 immunoprecipitation using anti-SNAP29, and the associated, STX17, ATG14L, and VAMP8 were  
870 determined using immunoblotting (n=3 per group). **(f-g)** Representative immunofluorescence  
871 micrograph of anti-SNAP29 labeled with secondary antibody *Alexa Fluor 594 (Red)* and anti-  
872 VAMP8 labeled with secondary antibody *Alexa Fluor 488 (Green)*, counterstained with DAPI  
873 (*nuclear stain*) from section of gastrocnemius (GAS) muscle from WT (n=3), *mdx* (n=3) and TubA  
874 treated *mdx* (n=5)(*scale bar -50 $\mu$ m; Magnification-40X*).Quantitative values for colocalization  
875 analysis was represented as the Pearson's Correlation Coefficient of SNAP29-VAMP8. **(h-i)**  
876 Protein expressions of lysosomal proteins, LAMP2 (n=3 per group) and Cathepsin-B ((n=6 per  
877 group) were determined by western blot in WT, *mdx*, and TubA treated *mdx* mice. Densitometry  
878 analysis of western blots represented by box plots. GAPDH served as a loading control. Statistical  
879 difference between groups were determined using ANOVA with Tukey's *post hoc* test.

880 **Fig. 6 HDAC6 inhibition prevents deacetylation and hyperoxidation of PrxII in *mdx* mice (a)**  
881 Skeletal muscle lysate was prepared and subjected to immunoprecipitation using anti-PrxII, and  
882 the acetylation levels of PrxII was determined with the anti-acetyl lysine antibodies **(b-c)** Protein  
883 expressions of total PrxII and Prx-SO<sub>2/3</sub> were determined by western blot in WT, *mdx*, TubA  
884 treated *mdx* mice (n=3 per group). Densitometry analysis of western blots and the ratio of PrxSO<sub>2/3</sub>  
885 and total PrxII were represented by box plots. **(d)** Stretch-induced ROS measurements in  
886 diaphragm muscles of *mdx* (n=2) and TubA treated *mdx* (n=3) mice. GAPDH served as a loading  
887 control. Statistical difference between groups were determined using ANOVA with Tukey's *post*  
888 *hoc* test. . Statistical difference between two groups were determined using two-sample student-*t*-  
889 test and Welch's correction test was performed for non-equal variance between two groups in  
890 **panel d.**

891 **Fig.7. TubA treatment alleviates apoptosis and immune cells infiltration in *mdx* muscle. (a-**  
892 **b)** Protein expressions of pro-caspase-3 and cleaved caspase-3 were determined by western blot  
893 from TA muscles extract of WT, *mdx*, and TubA treated *mdx* (n = 3 per group). Densitometry  
894 analysis of immunoblots represented by graph. GAPDH as a loading control **(c-d)** Paraffin-  
895 embedded gastrocnemius (GAS) muscle sections (4 $\mu$ m) of WT (n=3), *mdx* (n=3) and *mdx*+TubA  
896 (n=5) mice processed for the detection of TUNEL positive nuclei (*green*). Sections were stained  
897 with  $\alpha$ -laminin (*red*) to define the sarcolemma. Nuclei were counterstained with DAPI (*blue*).  
898 White boxed region shows the enlarged image from the *mdx* muscle section in the panel on right  
899 indicating TUNEL positive nuclei (*white arrow*).Numbers of TUNEL positive nuclei counted by  
900 Image J software. **(e-f)** Macrophage infiltration analyzed by Immunofluorescence staining of  
901 CD68 (*green*),  $\alpha$ -laminin (*red*), and nuclei (*blue*) in GAS section isolated from WT (n=3), *mdx*  
902 (n=3), *mdx*+TubA (n=5) mice. White boxed region shows the enlarged image from the *mdx* muscle  
903 section indicating infiltration of CD68+ cells in the skeletal muscles (*white arrow*).Quantification

904 of CD68 positive immune cells. *Scale bar (50 $\mu$ m), Magnification-40X.* Statistical difference  
905 between groups were determined using ANOVA with Tukey's *post hoc* test.

906 **Fig. 8 HDAC6 inhibition ameliorates muscle pathophysiology and improves muscle function**  
907 (a) Serum creatine phosphokinase quantitated by ELISA (n = 8 per group) (b-c) Loss of  
908 sarcolemmal integrity was evaluated by the *i.p.* Injection of Evans Blue Dye (EBD) in mice. Dye  
909 injected 24hr prior to the completion of two weeks TubA treatment. EBD staining of diaphragm  
910 (DIA) muscles and its cross section (4 $\mu$ m) showing EBD positive fibers. Quantification of EBD  
911 positive fibers in DIA muscle fibers (n=3 per group). *Scale bar (90 $\mu$ m), Magnification-20X.* (d)  
912 H&E-stained muscle (TA). White arrow head= peripheral nuclei; black arrow head=central nuclei;  
913 black arrow=necrotic myofibers (infiltration of immune cells); black asterisk=fat depositions  
914 within myofibers. (n = 3 mice per group), *Scale bar: 50  $\mu$ m, Magnification-40X.*  
915 Immunofluorescence staining of  $\alpha$ -laminin (*green*) and DAPI (*blue nuclei staining*) in TA cross-  
916 section muscle of WT, *mdx*, TubA treated *mdx*. (n=3 per group) (e) Percentage fibers with  
917 centralized nuclei was quantified by Image J. *Scale bar: 50  $\mu$ m, Magnification-40X* (f) Myofibers  
918 CSA calculated from minimum feret's diameter (n=3 per group). (g-h) Grip strength, absolute and  
919 normalized to body weight (n = 5 per group). (i) Force–frequency relationship in DIA muscle strips  
920 from WT (n = 9), *mdx* (n = 8), and *mdx*+TubA (n = 9). (j). Eccentric contraction induced force  
921 drop (normalized to the first contraction) in EDL muscles isolated from WT (n=6), *mdx* (n=7),  
922 TubA treated *mdx* (n=6) mice. Statistical difference between groups were determined using  
923 ANOVA with Tukey's *post hoc* test. \*p<0.05 vs BL10, \*\*P<0.01 vs BL10, \*\*\*p<0.001 vs BL10,  
924 \*P<0.05 vs *mdx*, \*\*p<0.01 vs *mdx* for panel i and j.

925 **Fig. 9. Model of Impaired autophagy in mdx skeletal muscle are differentially regulated by**  
926 **redox and acetylation modifications.** (A) Loss of dystrophin leads to increased HDAC6  
927 expression and subsequent deacetylation of  $\alpha$ -tubulin. Decreased  $\alpha$ -tubulin acetylation inhibits  
928 binding of the kinesin-/JIP-1 complex and subsequent transport of autophagosomes to lysosomes.  
929 Decreased activation of JIP-1 results in decreased phosphorylation of JNK and Bcl-2, preventing the  
930 dissociation of BECN1/Bcl-2 and sequestering BECN1 away from the PI3classIII complex  
931 (ATG14L-Vps34-Vps15). The net result is impairment of phagophore nucleation. Decreased WIPI-  
932 1 inhibits localization of ATG5-12/16L1 complex to the phagophore, leading to impaired  
933 autophagosome maturation in *mdx* mice. SNARE associated proteins play a major role in  
934 membrane-mediated events of autophagosome-lysosome fusion, another crucial step in autophagy  
935 process. In *mdx* mice, reduced interaction of SNAP29 with STX17 and VAMP8 leads to the  
936 inhibition of autophagosome-lysosome fusion. (B) Genetic inhibition of Nox-2 activity in *mdx*  
937 mice activates JIP-1, resulting in phosphorylation of JNK and Bcl-2, dissociation of BECN1 from  
938 Bcl-2 and induction of phagophore nucleation. In addition, Nox-2 inhibition promotes ATG5-12  
939 complex formation and therefore autophagosome maturation. However, autophagosome-lysosome  
940 fusion is not improved upon inhibition of Nox-2 activity, likely due to no change in  $\alpha$ -tubulin  
941 acetylation. Pharmacological inhibition of HDAC6 promotes  $\alpha$ -tubulin acetylation and improves  
942 SNARE complex formation, thereby facilitating fusion of autophagosomes with lysosomes,  
943 improves autophagy, decreases dystropathology and improves skeletal muscle function. Increased  
944 acetylation of the antioxidant enzyme Prx II likely contributes to improved muscle function in *mdx*  
945 skeletal muscle. **Figure created with [BioRender.com](https://www.biorender.com)**

# Figure 1

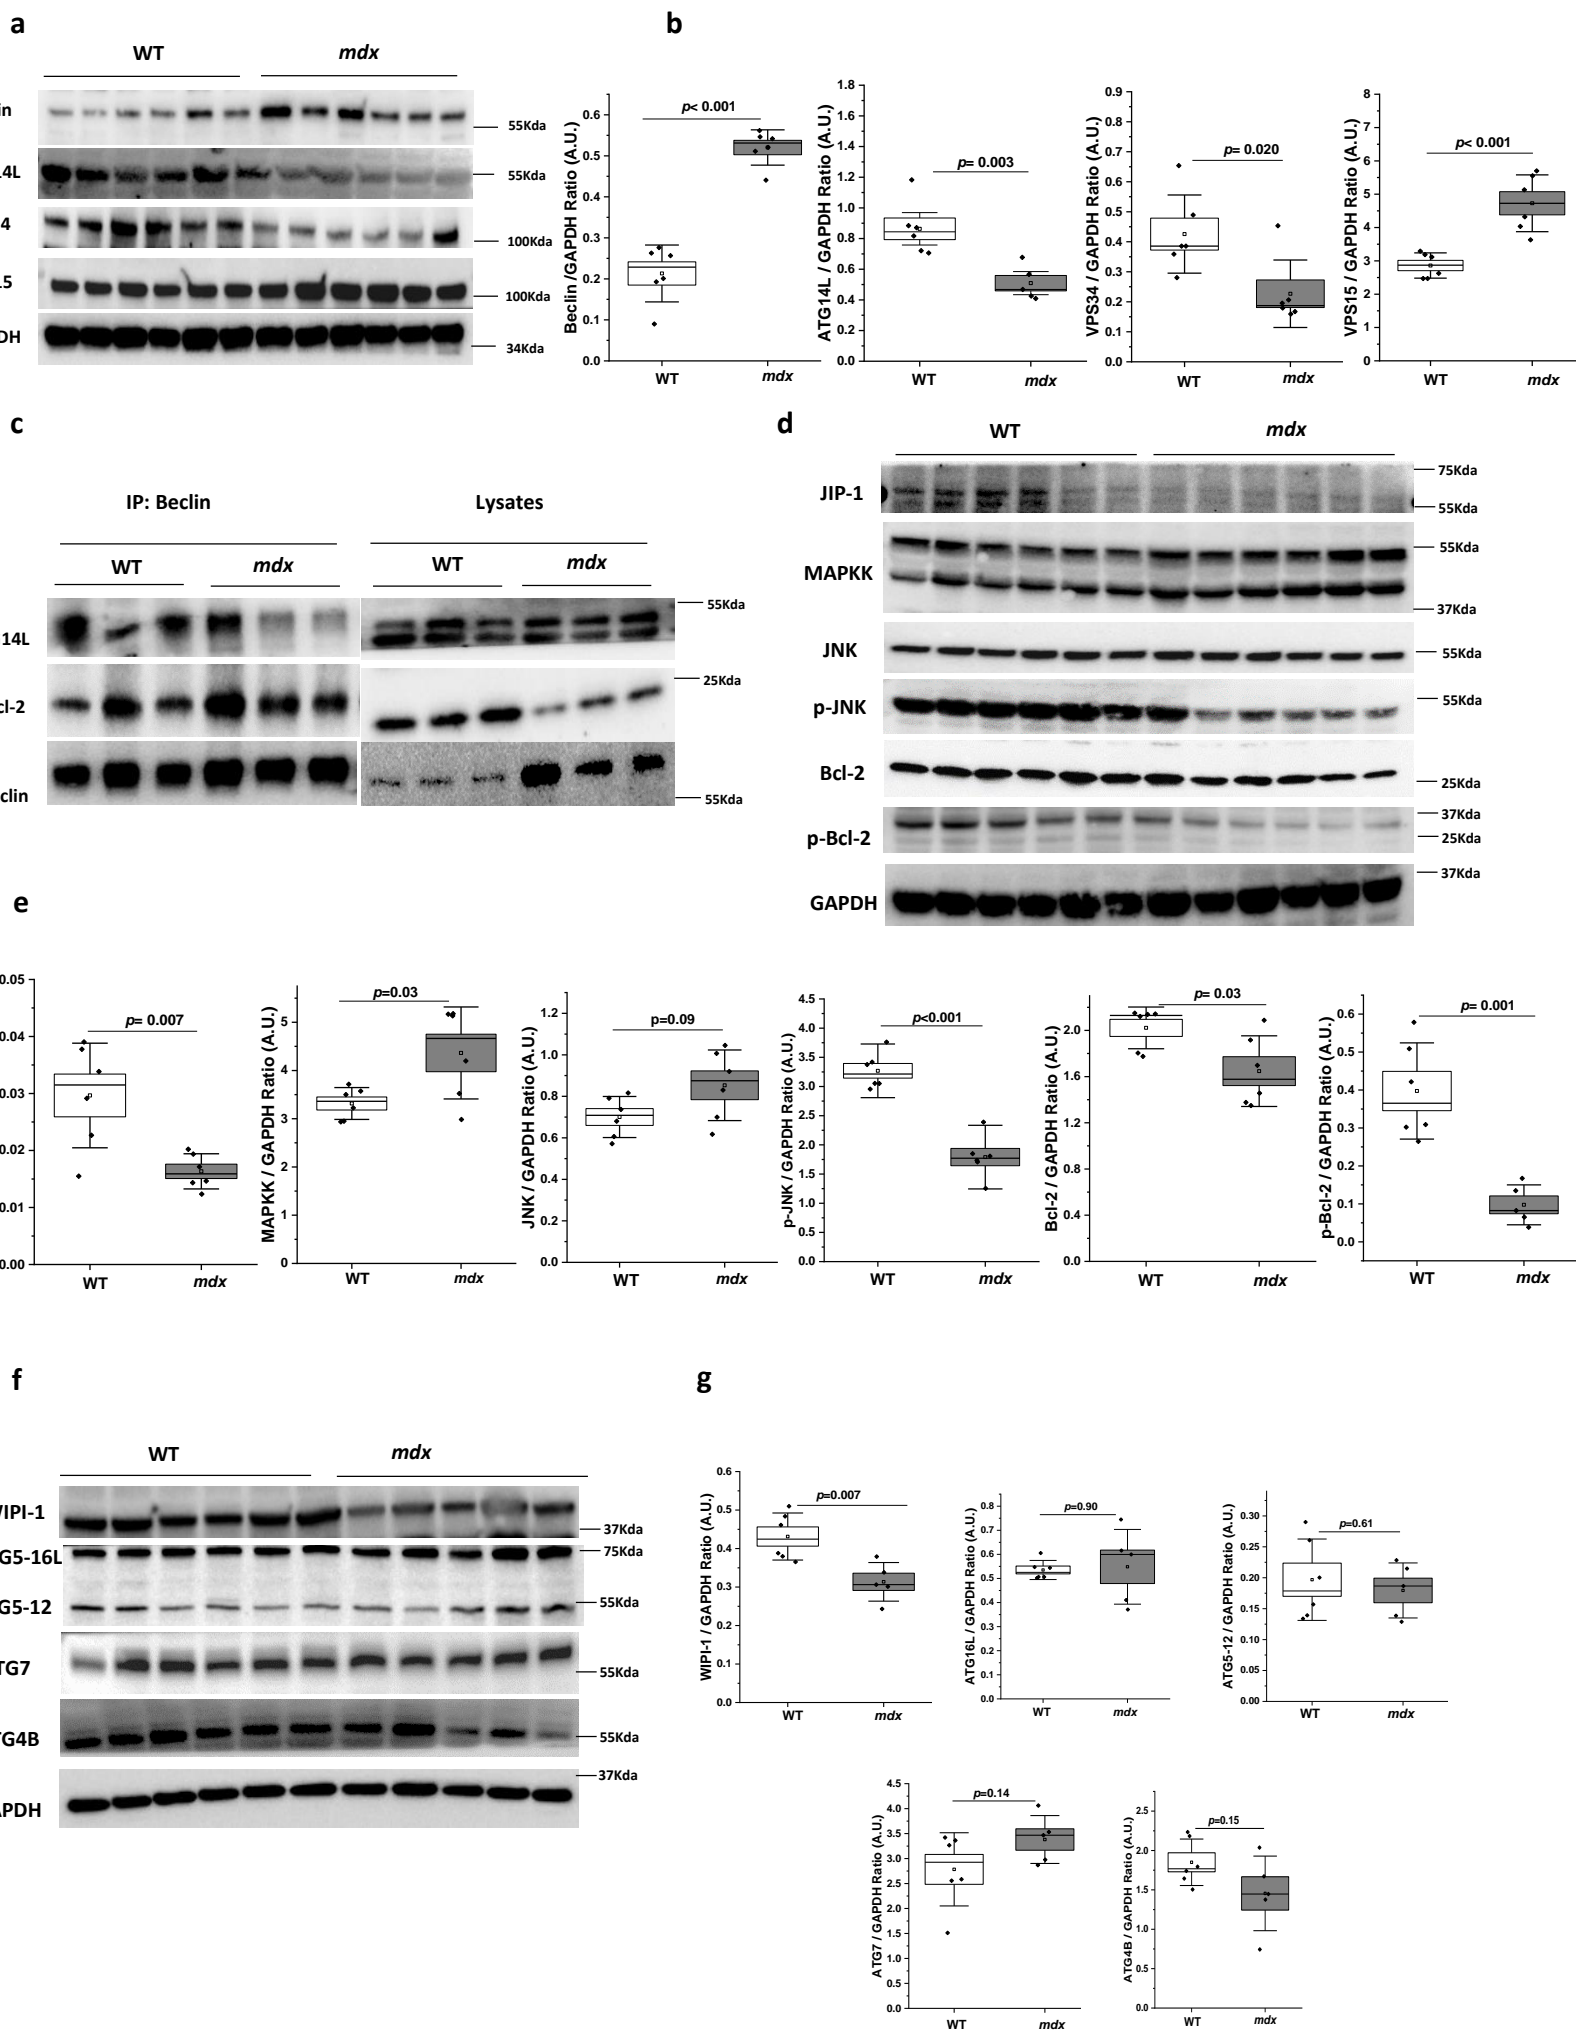

Figure 2

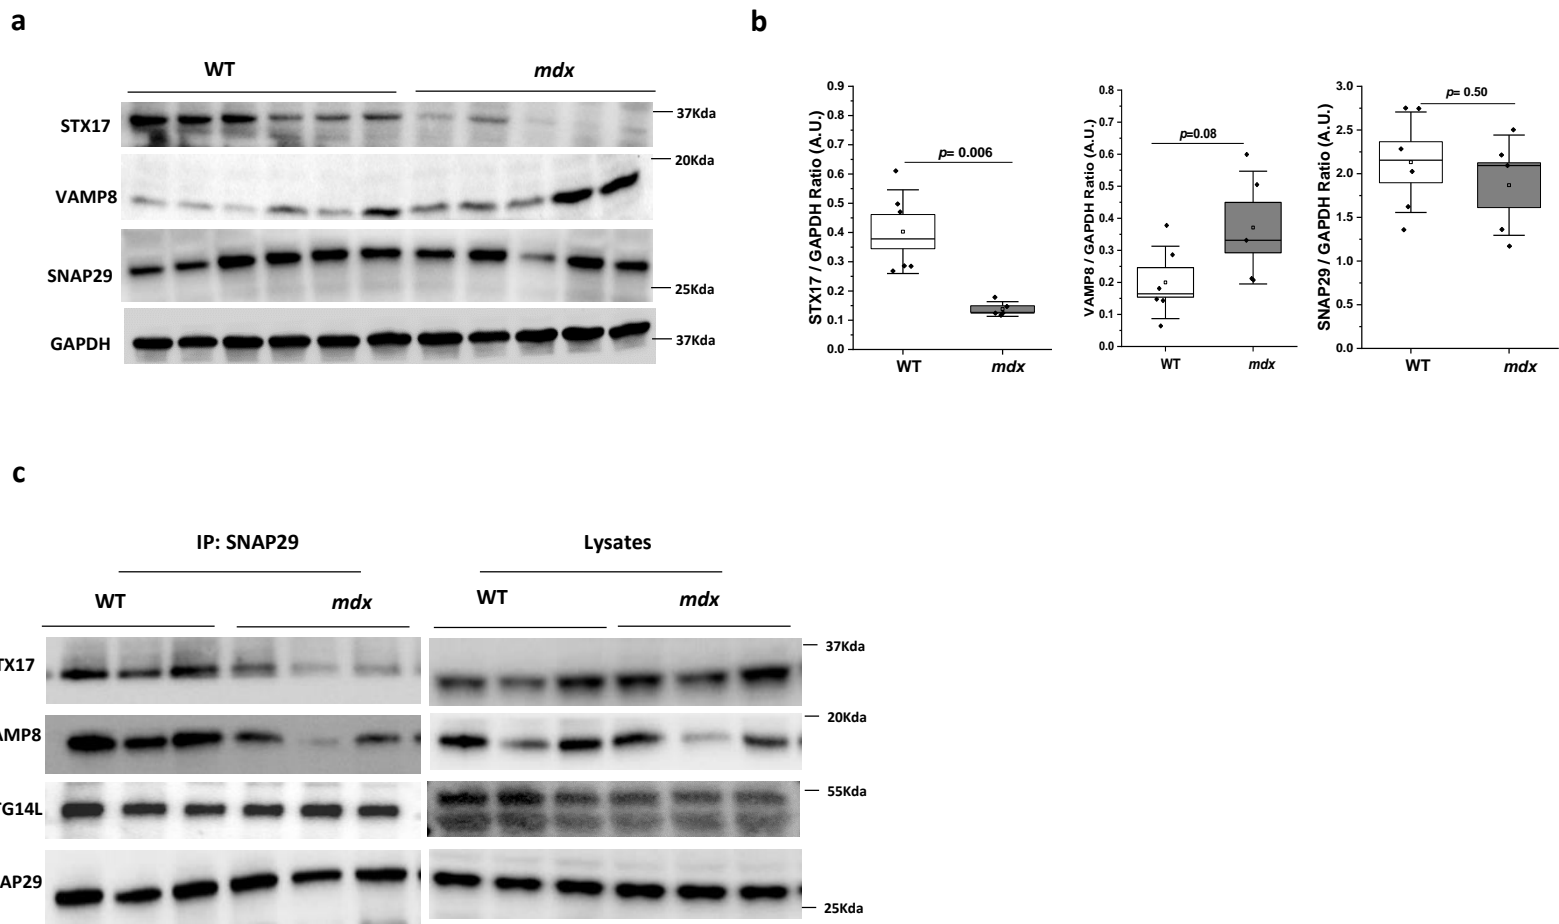

**Figure 3**

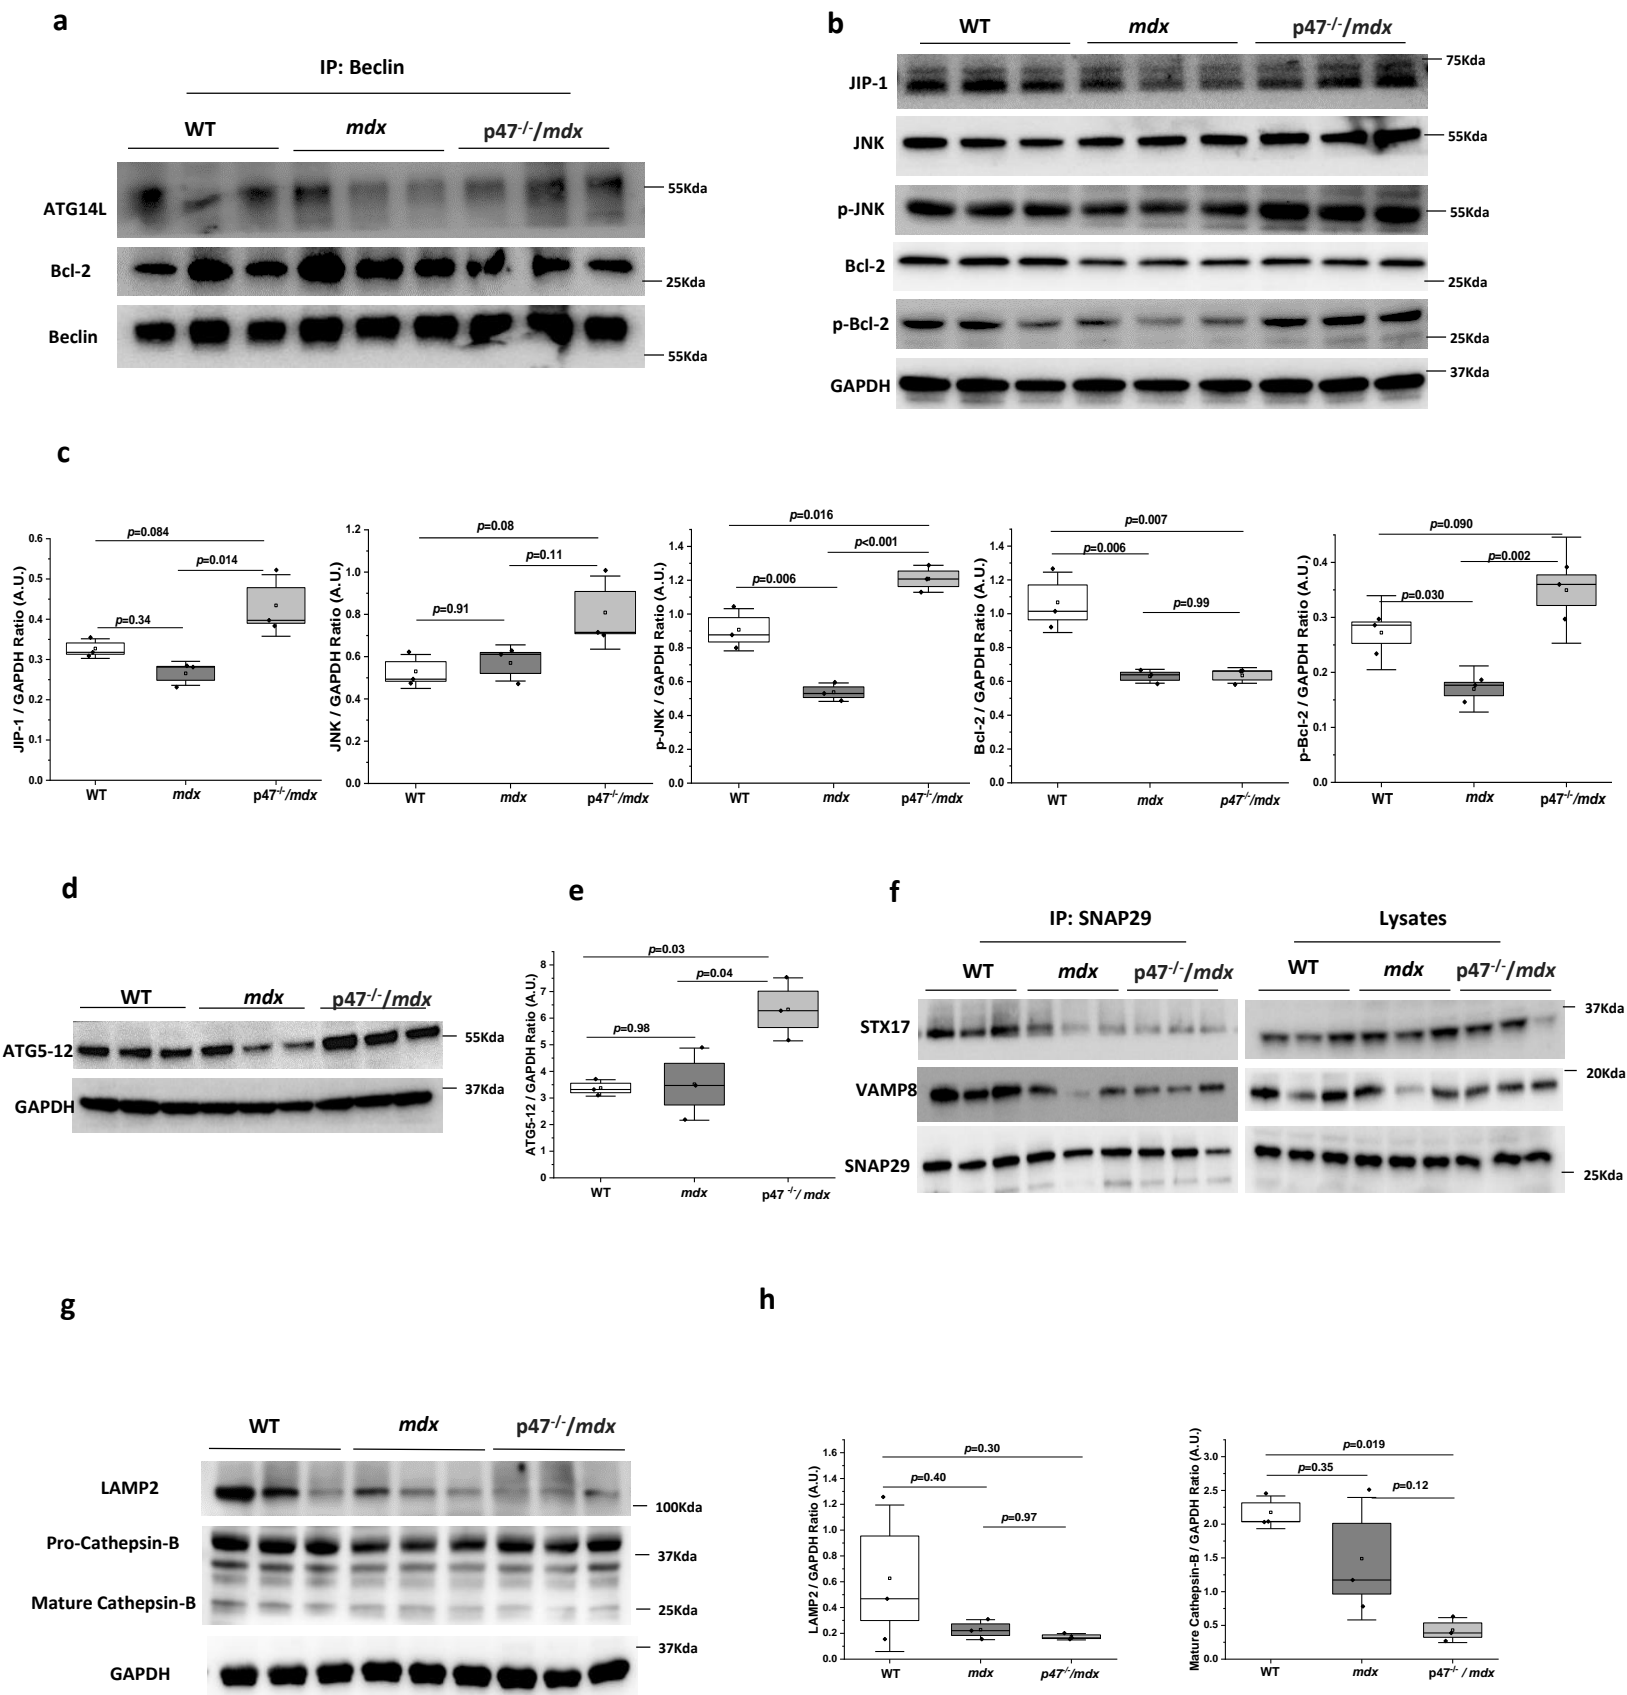

**Figure 4**

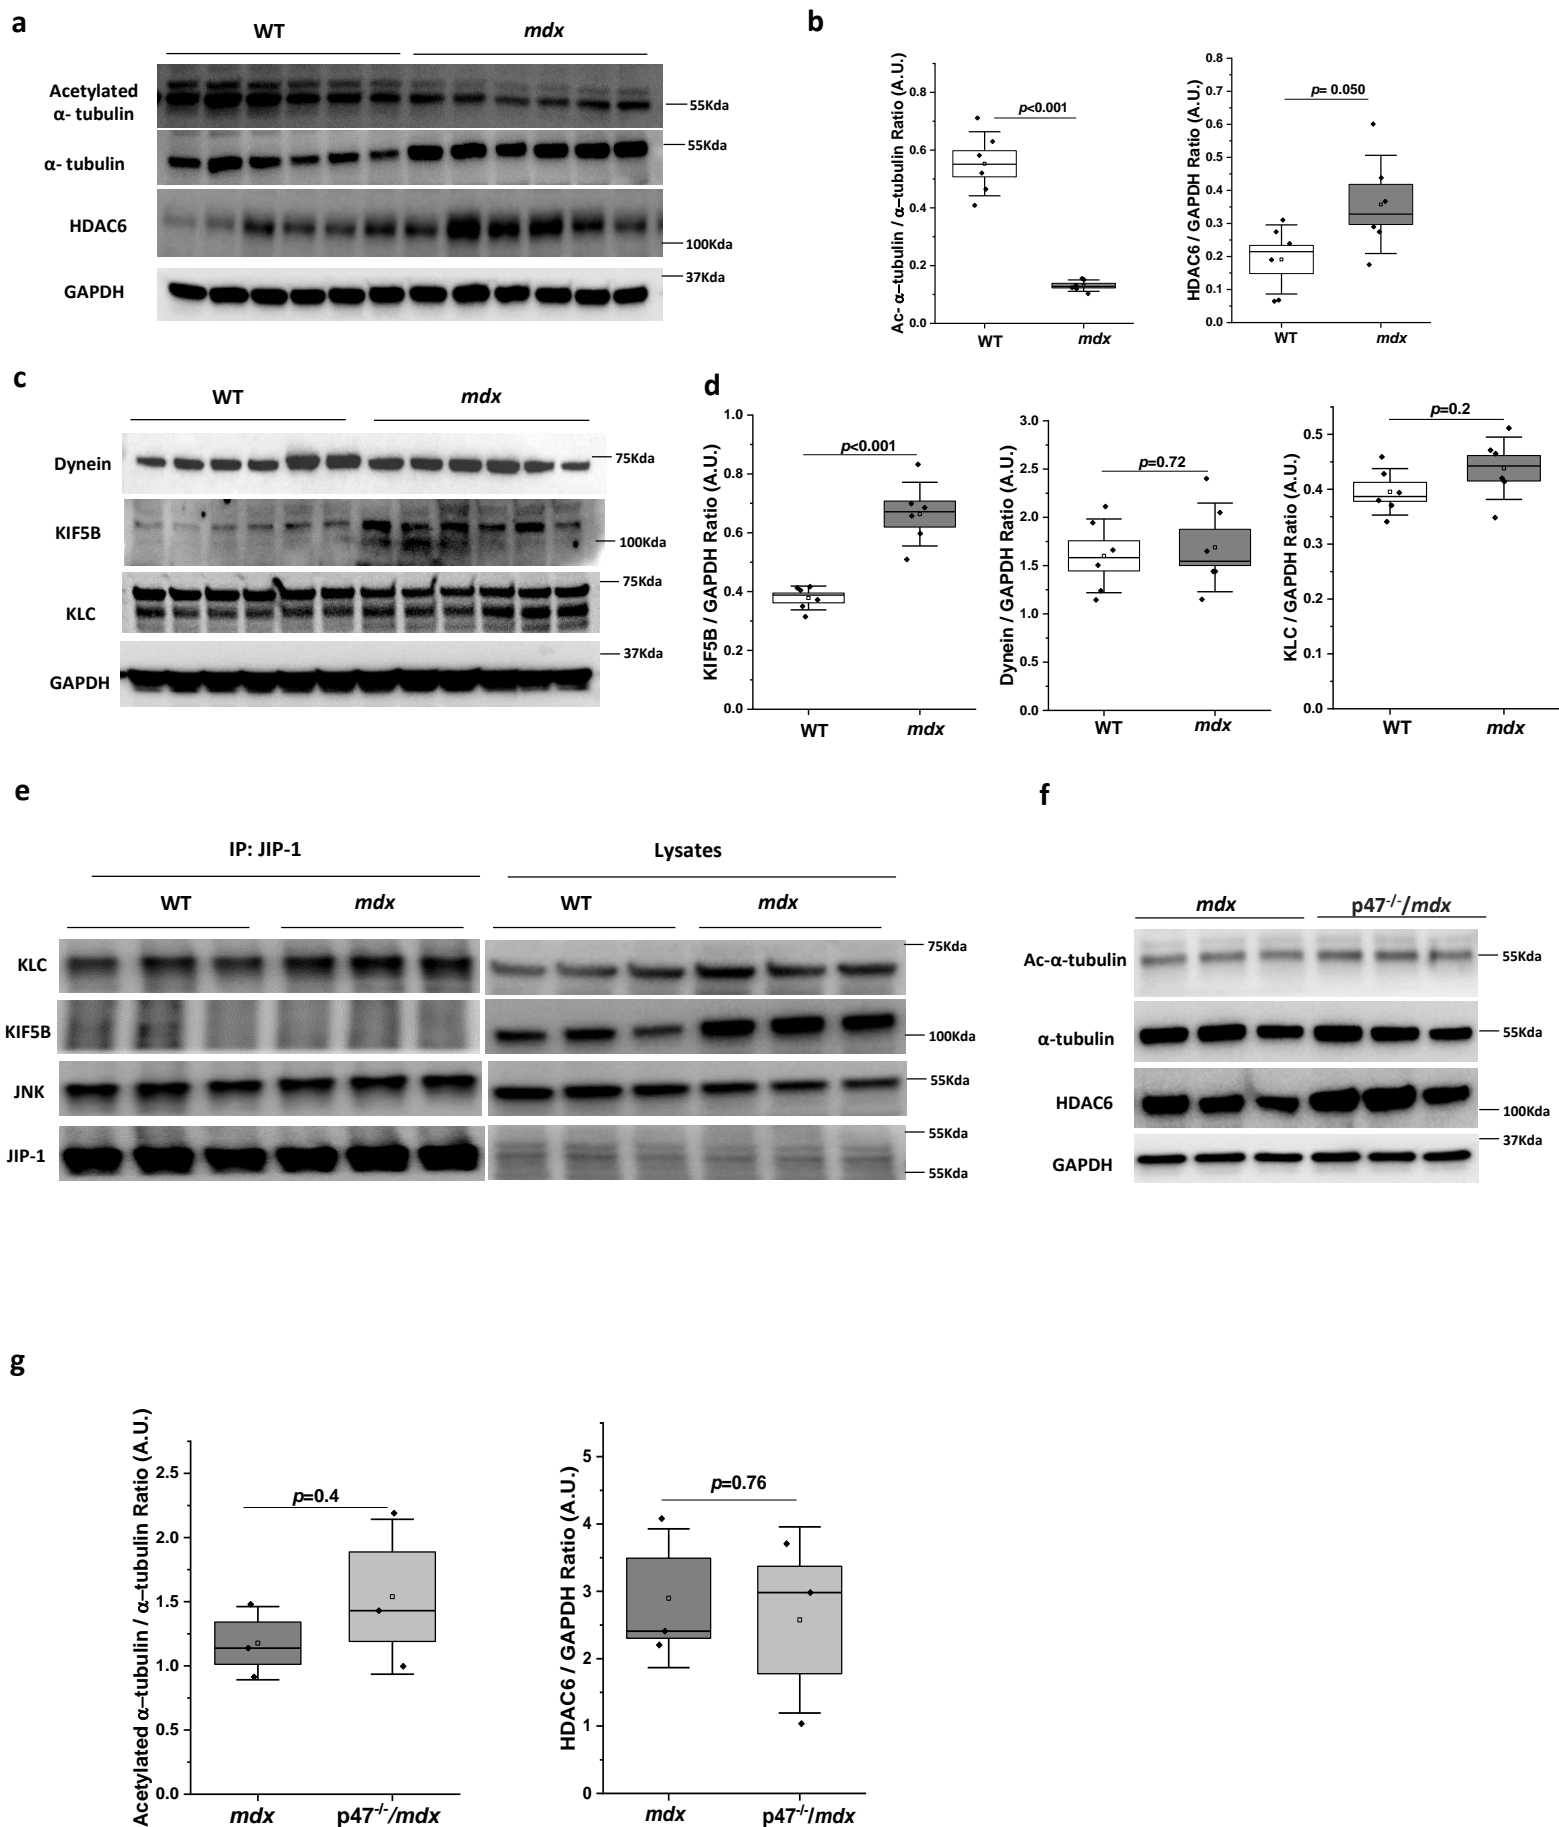

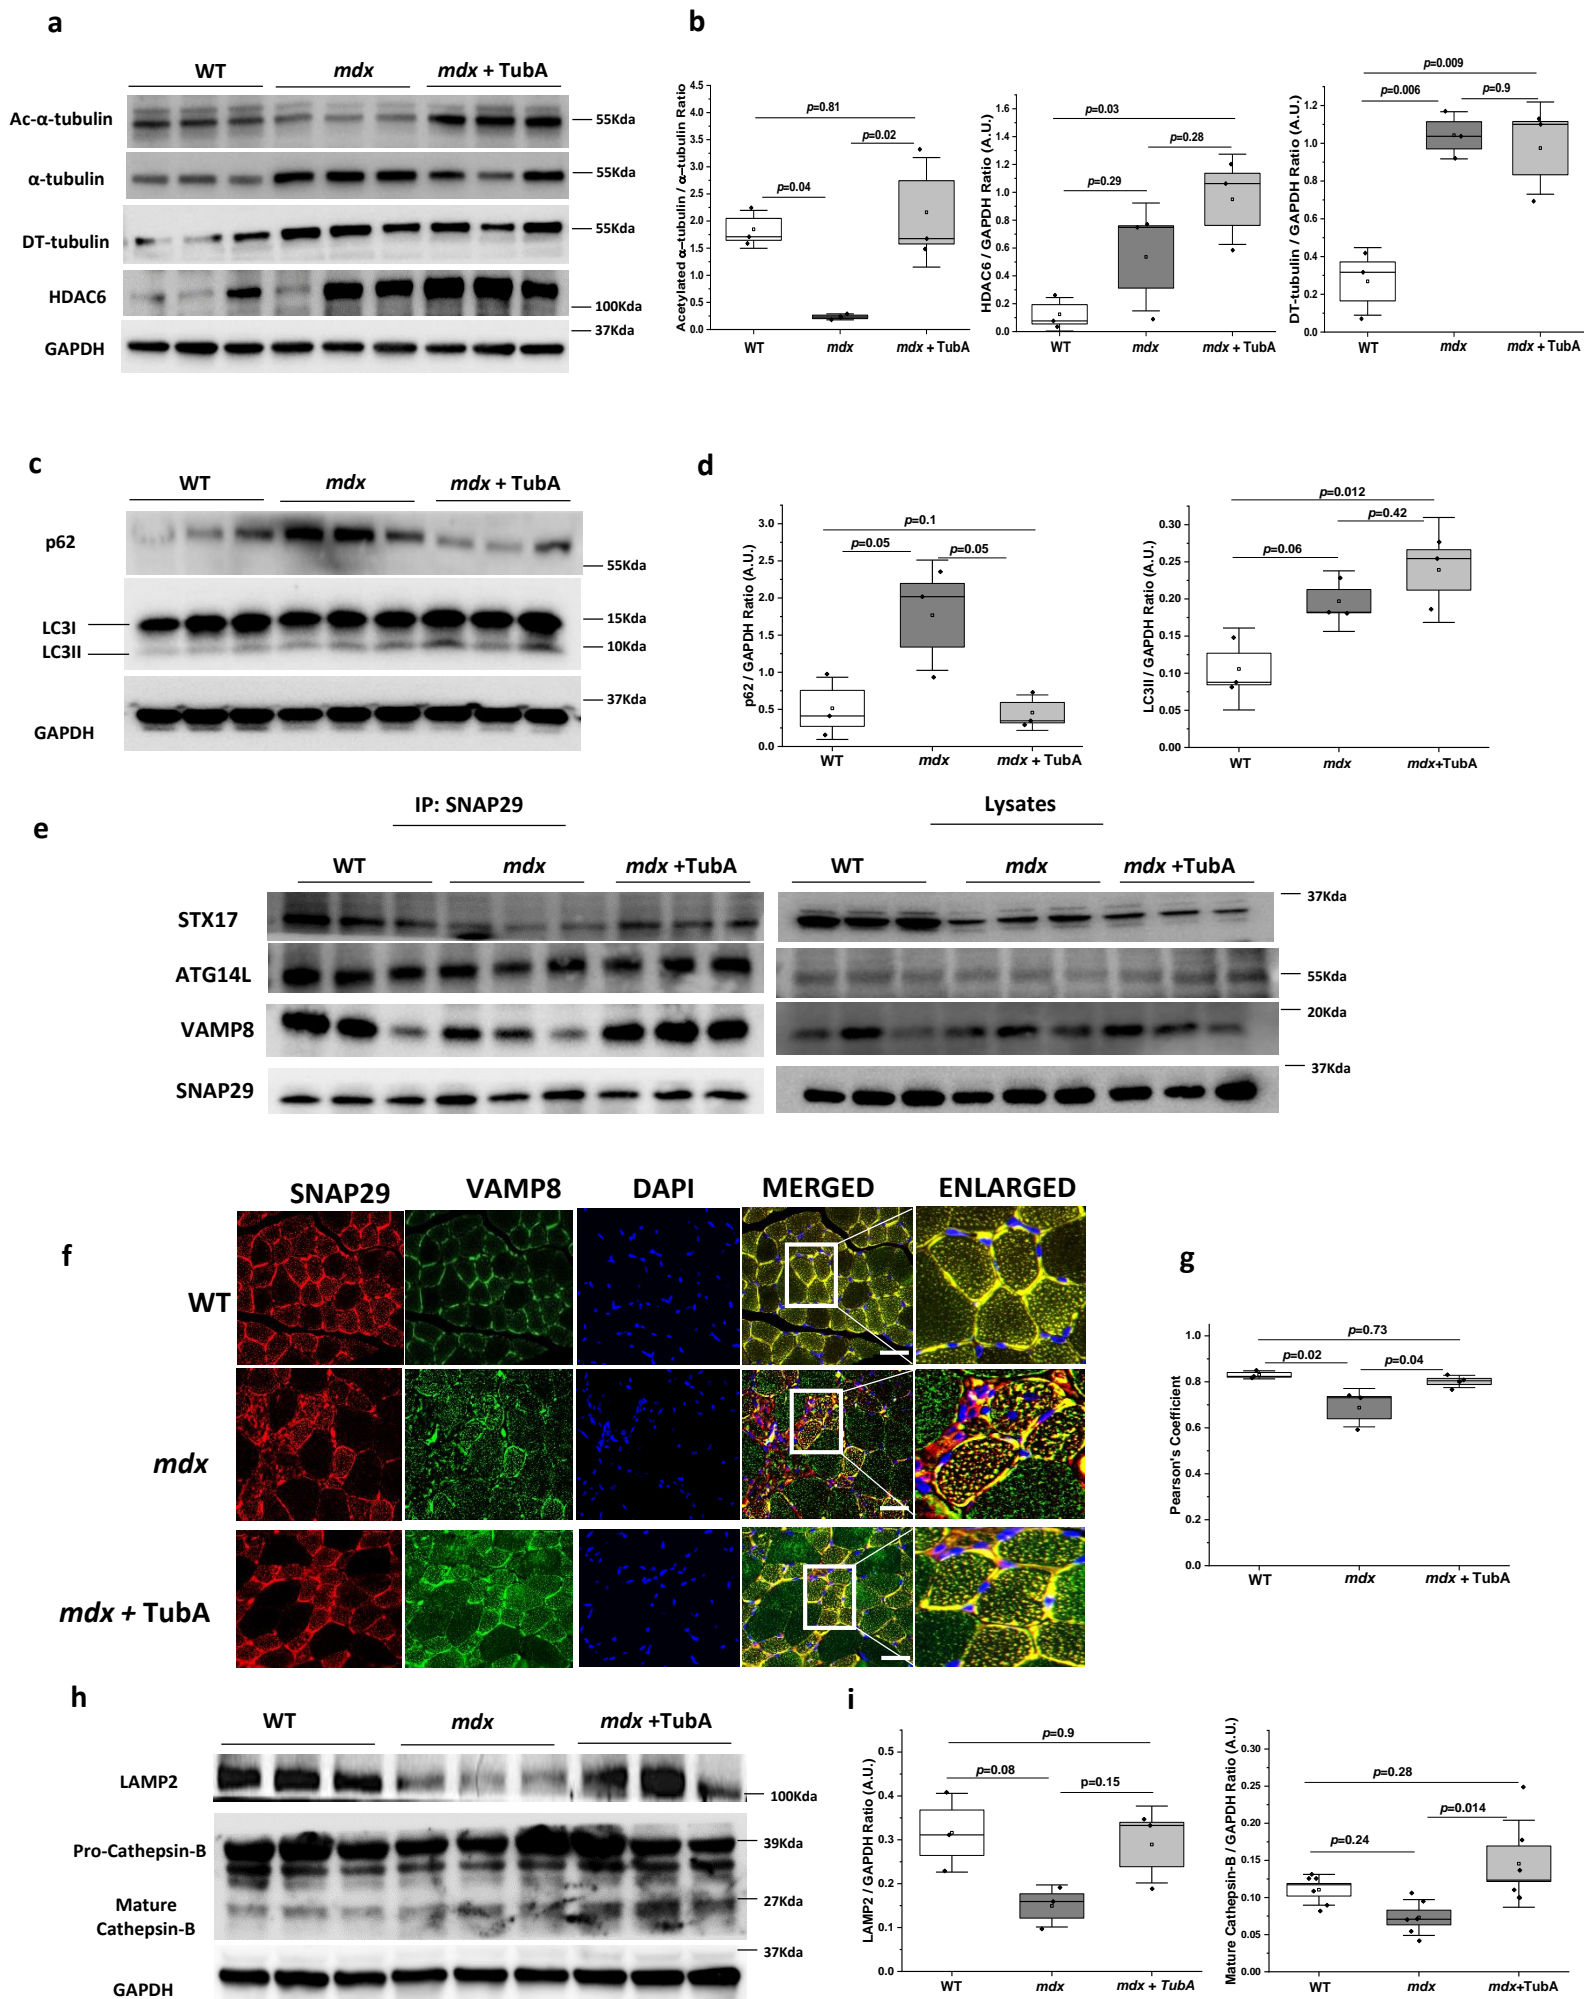



## Figure 6

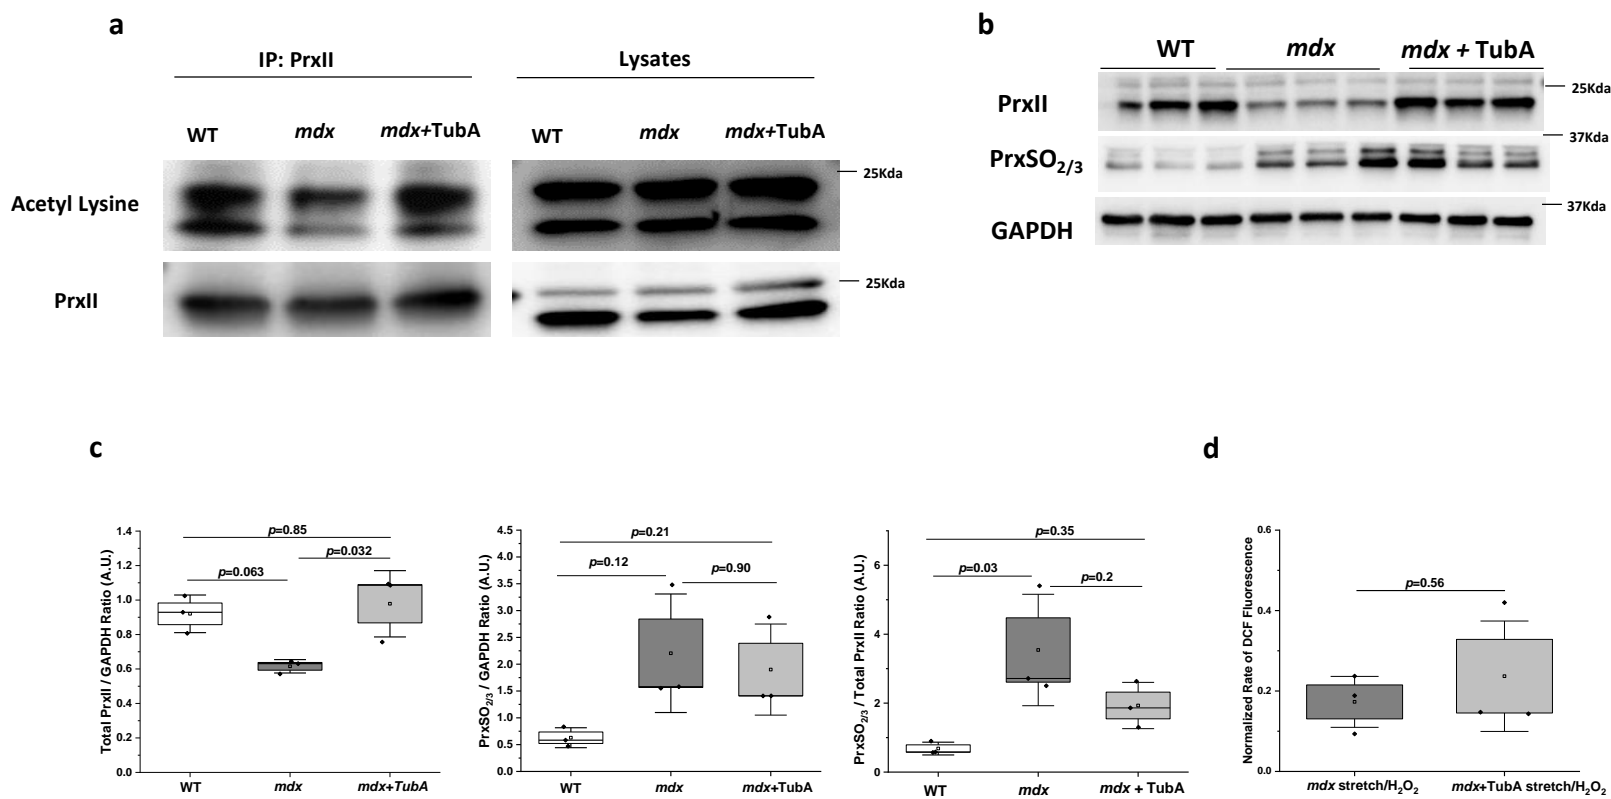

**Figure 7**

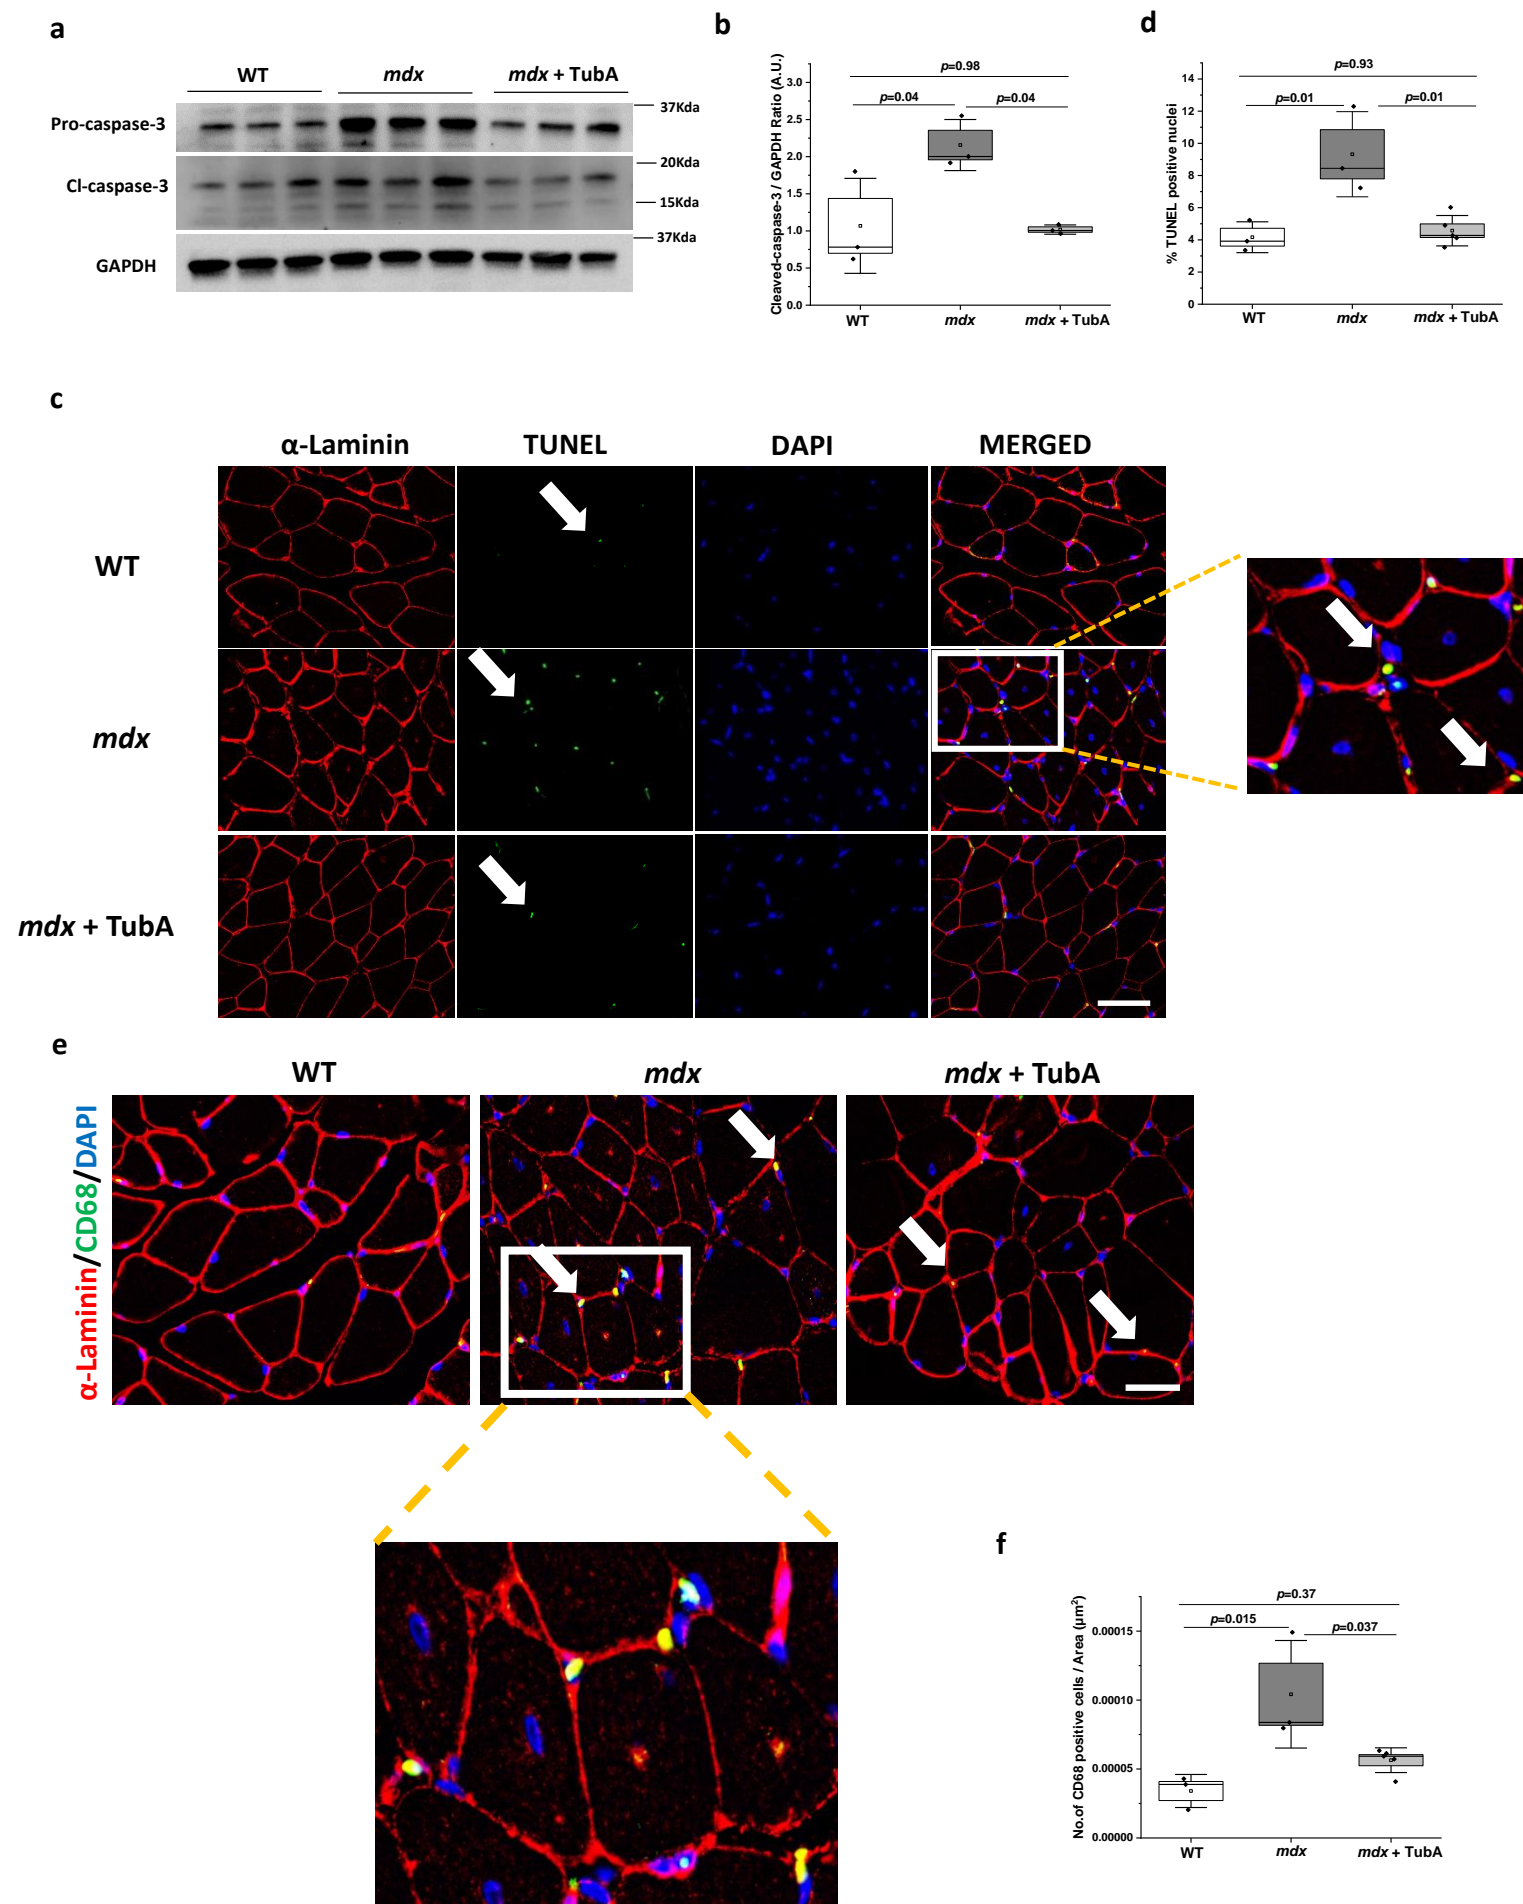

## Figure 8

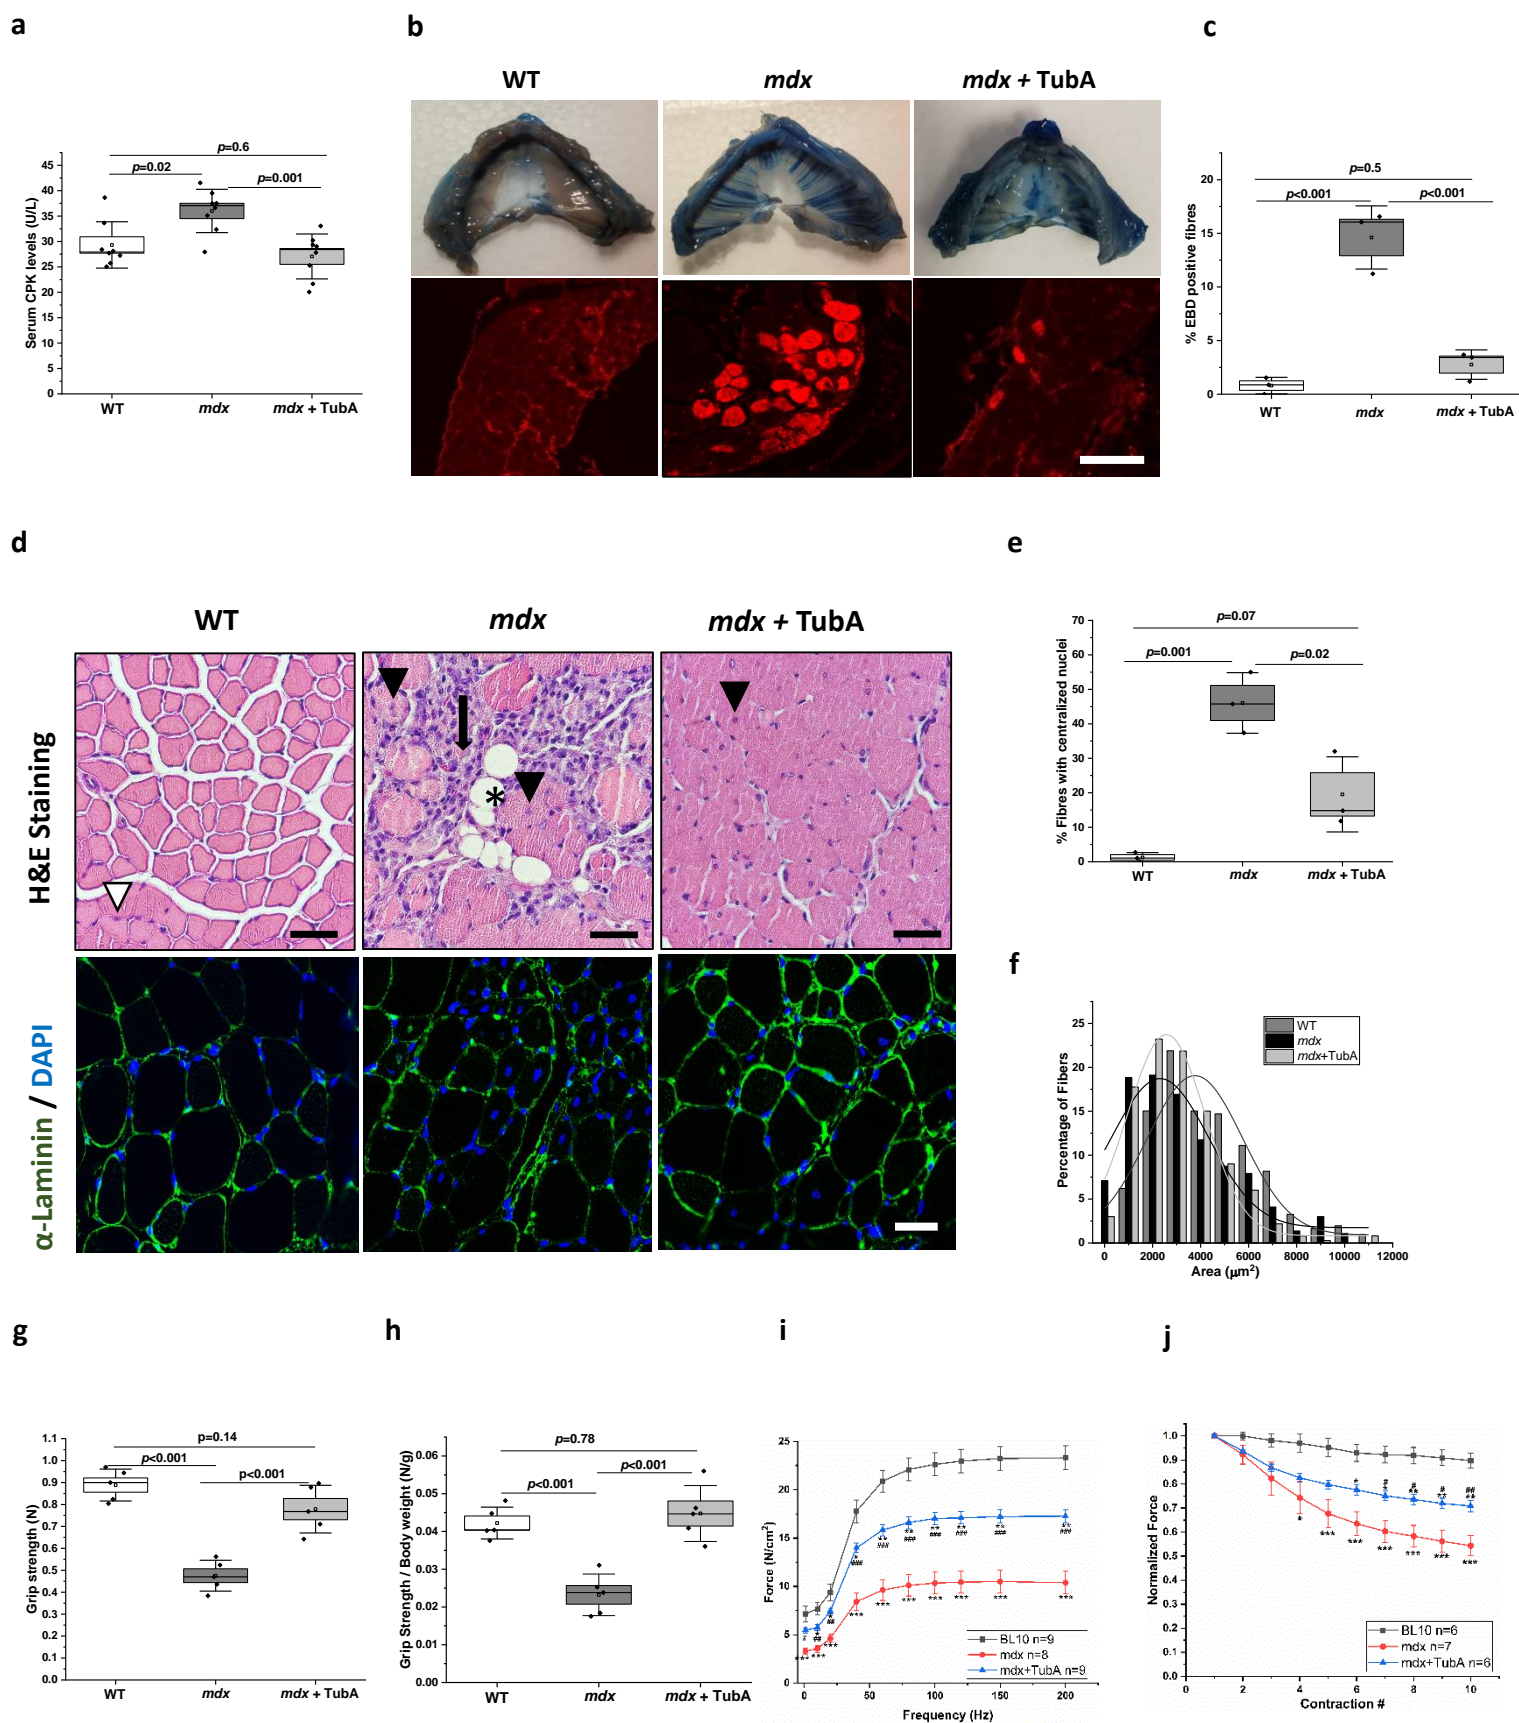

**Figure 9**

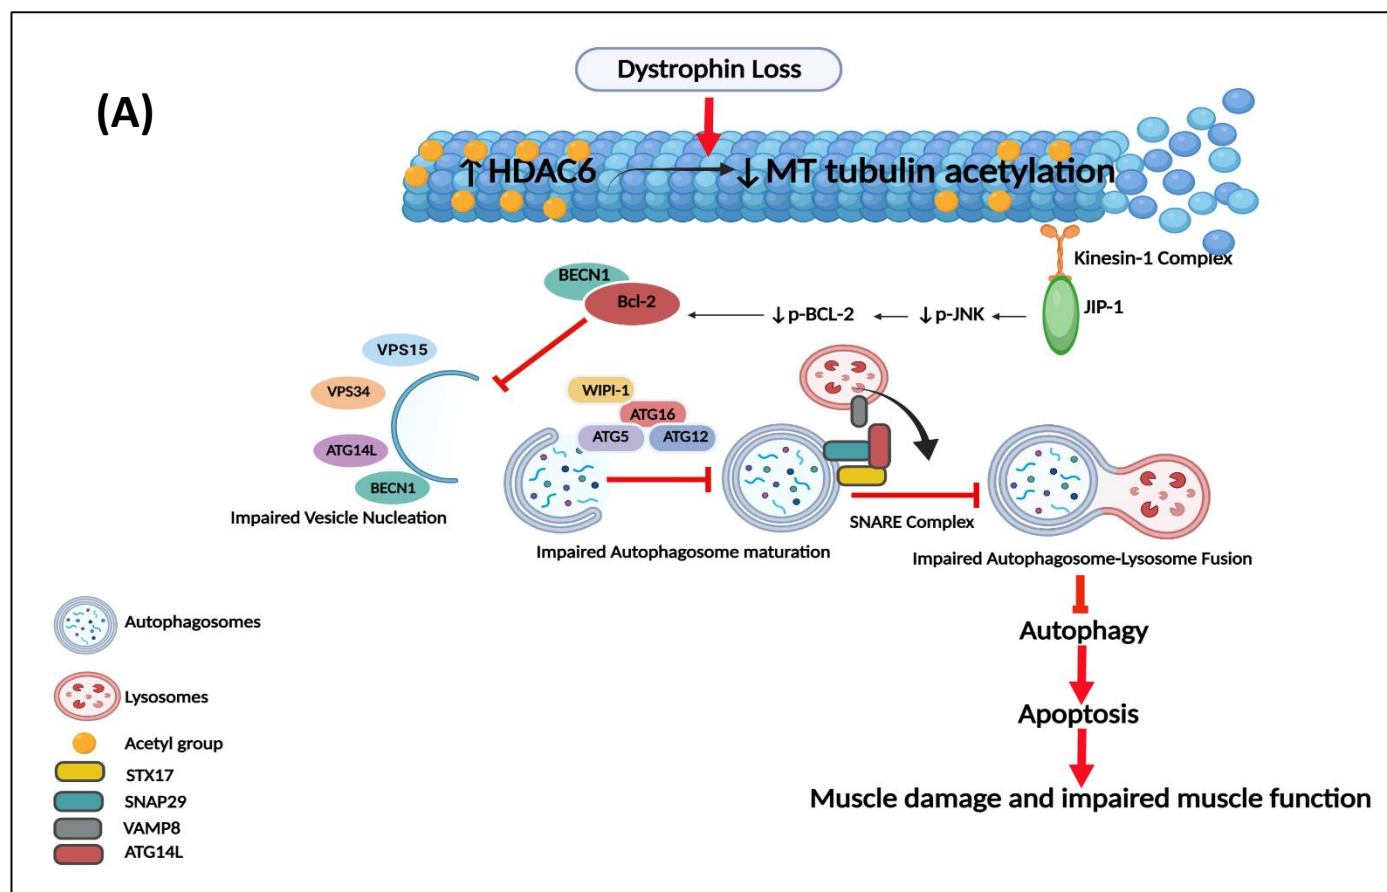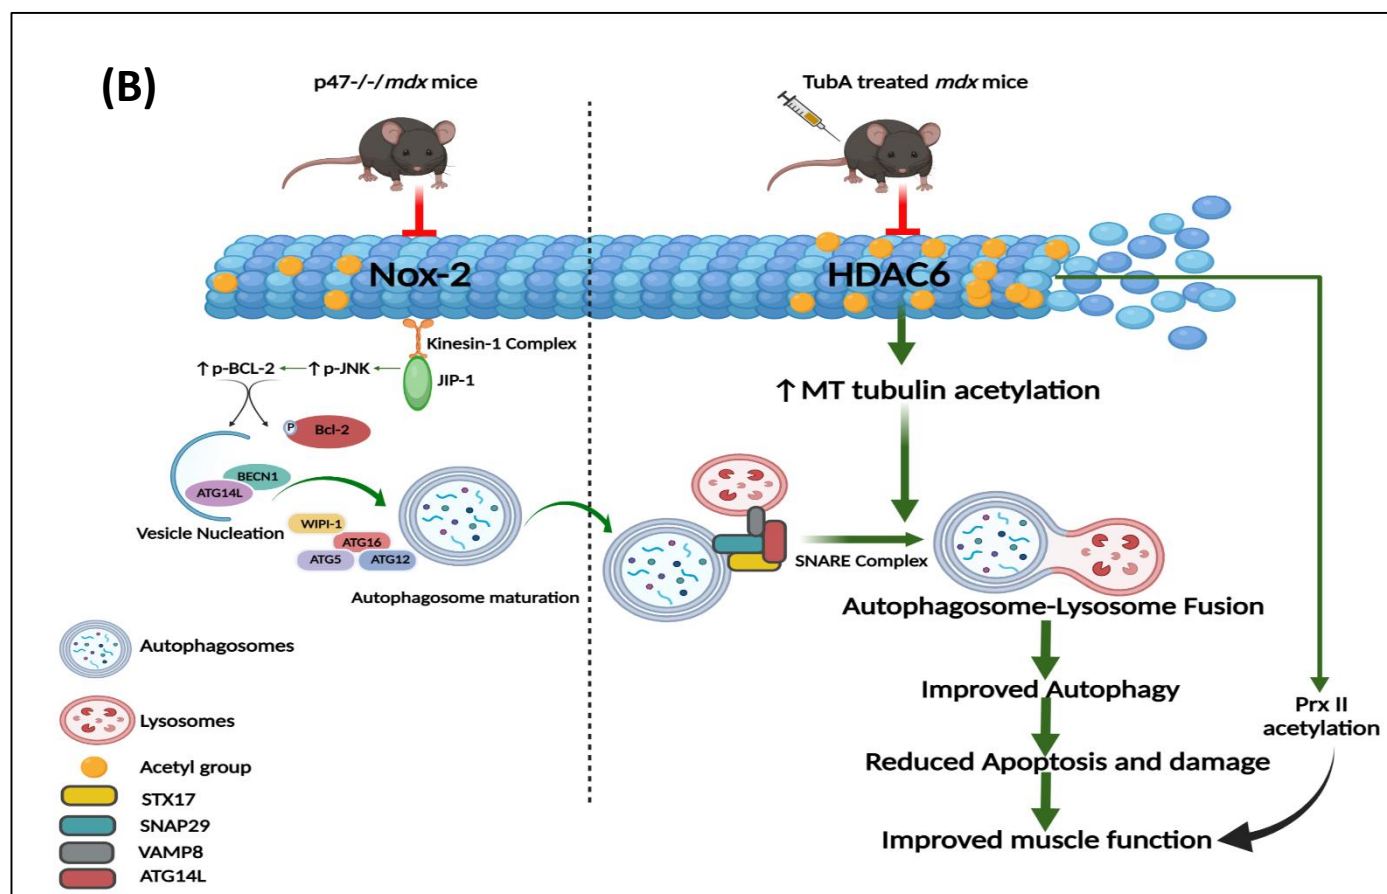

## Histone deacetylase 6 inhibition promotes microtubule acetylation and facilitates autophagosome-lysosome fusion in dystrophin-deficient *mdx* mice

Akanksha Agrawal<sup>1</sup>, Erin L. Clayton<sup>1</sup>, Courtney L. Cavazos<sup>1</sup>, Benjamin A. Clayton<sup>1</sup>,

George G. Rodney<sup>1\*</sup>

1. Department of Integrative Physiology, Baylor College of Medicine, Houston, TX, USA

\*All correspondence should be sent to [rodney@bcm.edu](mailto:rodney@bcm.edu)

### Supplementary Figure S1

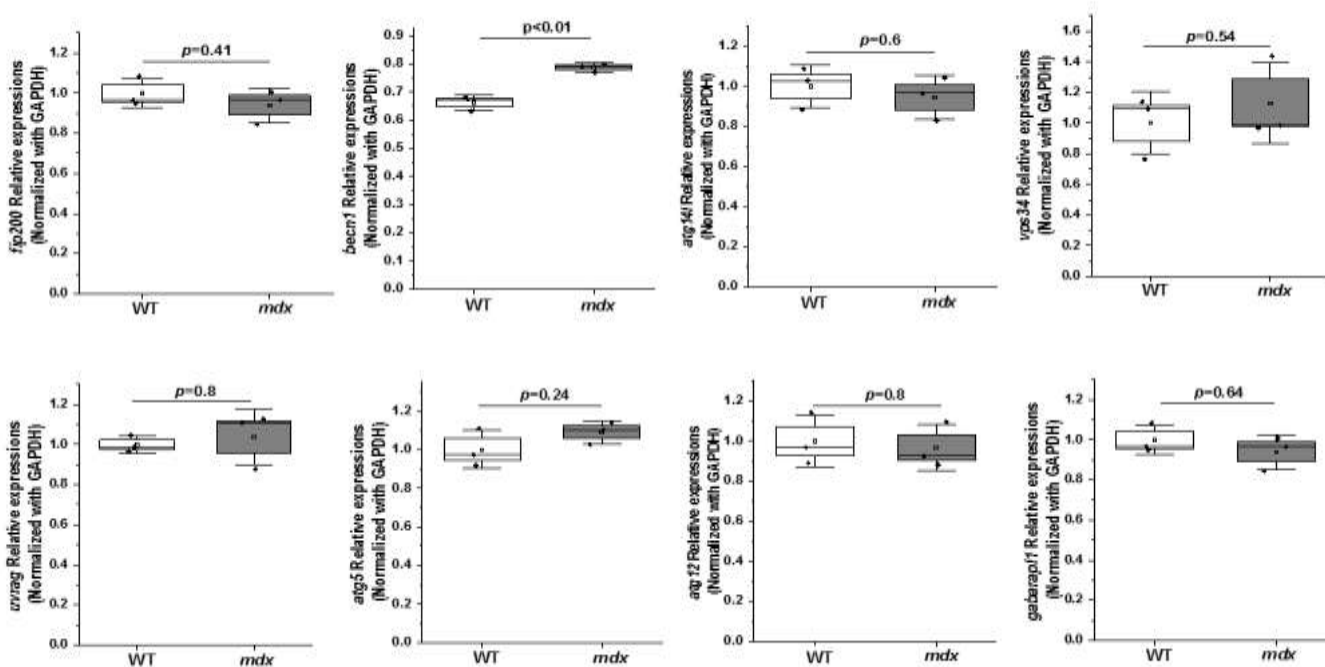

**Fig.S1. Gene expressional analysis of autophagy regulatory markers by Reverse-transcriptase PCR** Graph represents relative gene expressions of *fip200*, *becn1*, *atg14l*, *vps34*, *uvrag*, *atg5*, *atg12*, *gabarapl1* normalized with GAPDH (n=3 per group). Statistical difference between two groups were determined using two-sample student-*t*-test.

## Supplementary Figure S2

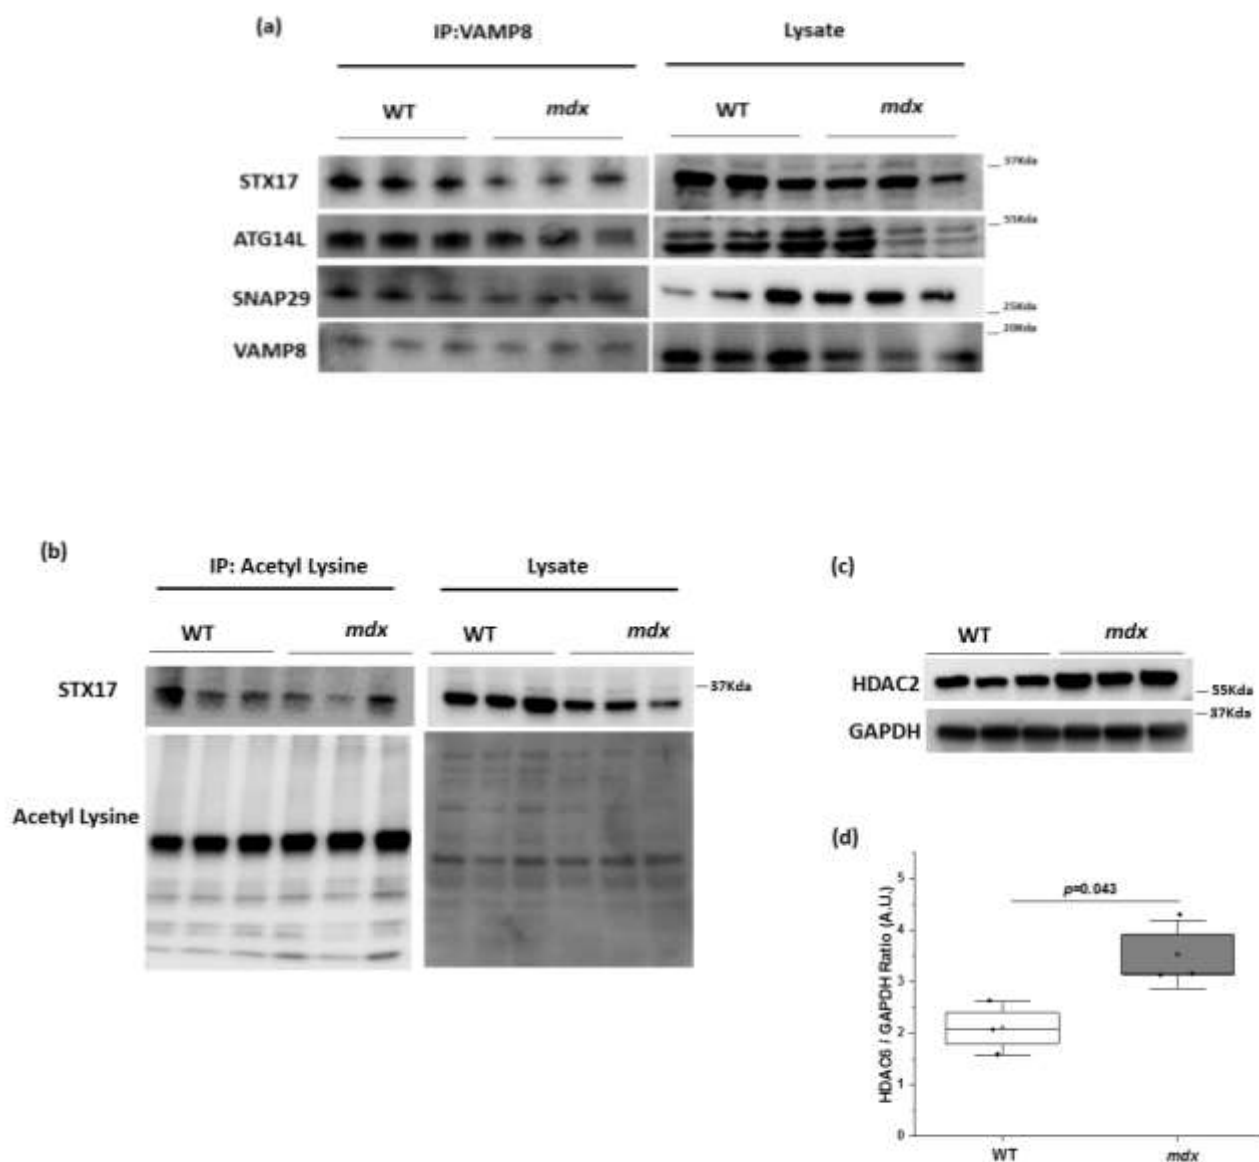

**Fig.S2. Impaired autophagosome-lysosome fusion in *mdx* mice** (a) Skeletal muscle lysate was prepared and subjected to immunoprecipitation using anti-VAMP8, and the associated STX17, ATG14L, and SNAP29 were determined using immunoblotting (b) Anti-acetyl-lysine was immunoprecipitated, and bound STX17 was detected by western blotting using anti-STX17 antibody (c-d) Immunoblot represents protein expressions of HDAC2. GAPDH served as a loading control. Densitometry analysis of immunoblot represented by graph. (n=3 per group in all Figure panels). Statistical difference between two groups were determined using two-sample student-*t*-test.

### Supplementary Figure S3

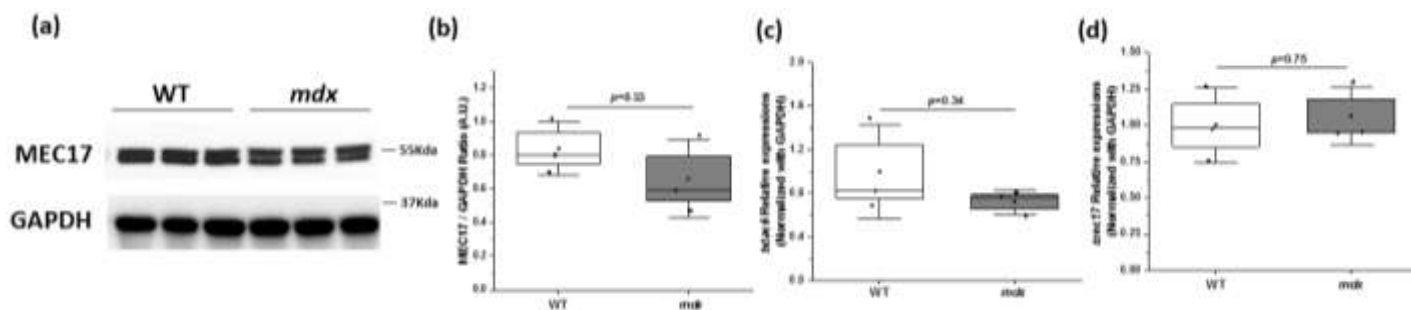

**Fig.S3. Expression analysis of acetylase and deacetylase enzymes in *mdx* mice** (a-b) Immunoblot represents protein expressions of MEC17. GAPDH served as a loading control. Densitometry analysis of immunoblot represented by graph (c-d) Graph represents relative gene expressions of deacetylase enzyme (*hdac6*) and acetylase enzyme (*mec17*) normalized with GAPDH. (n=3 per group in all Figure panels). Statistical difference between two groups were determined using two-sample student-*t*-test.

## Supplementary Figure S4

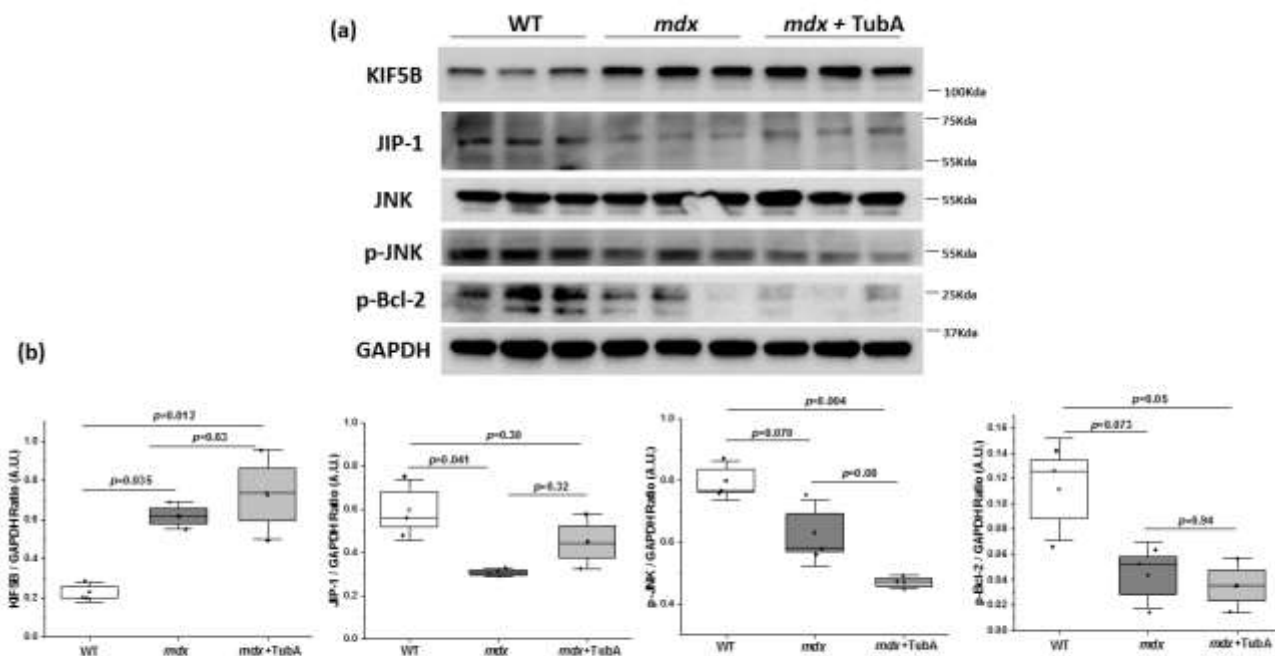

**Fig.S4 Effect of HDAC6 inhibition on Kinesin/JIP/JNK pathway in *mdx* mice (a-b)** Protein expressions of Kinesin/JIP/JNK complex in WT, *mdx* and TubA treated *mdx* mice (n=3 per group). GAPDH served as a loading control. Densitometry analysis of immunoblot represented by graph. Statistical difference between groups were determined using ANOVA with Tukey's *post hoc* test.



## Supplementary Figure S5

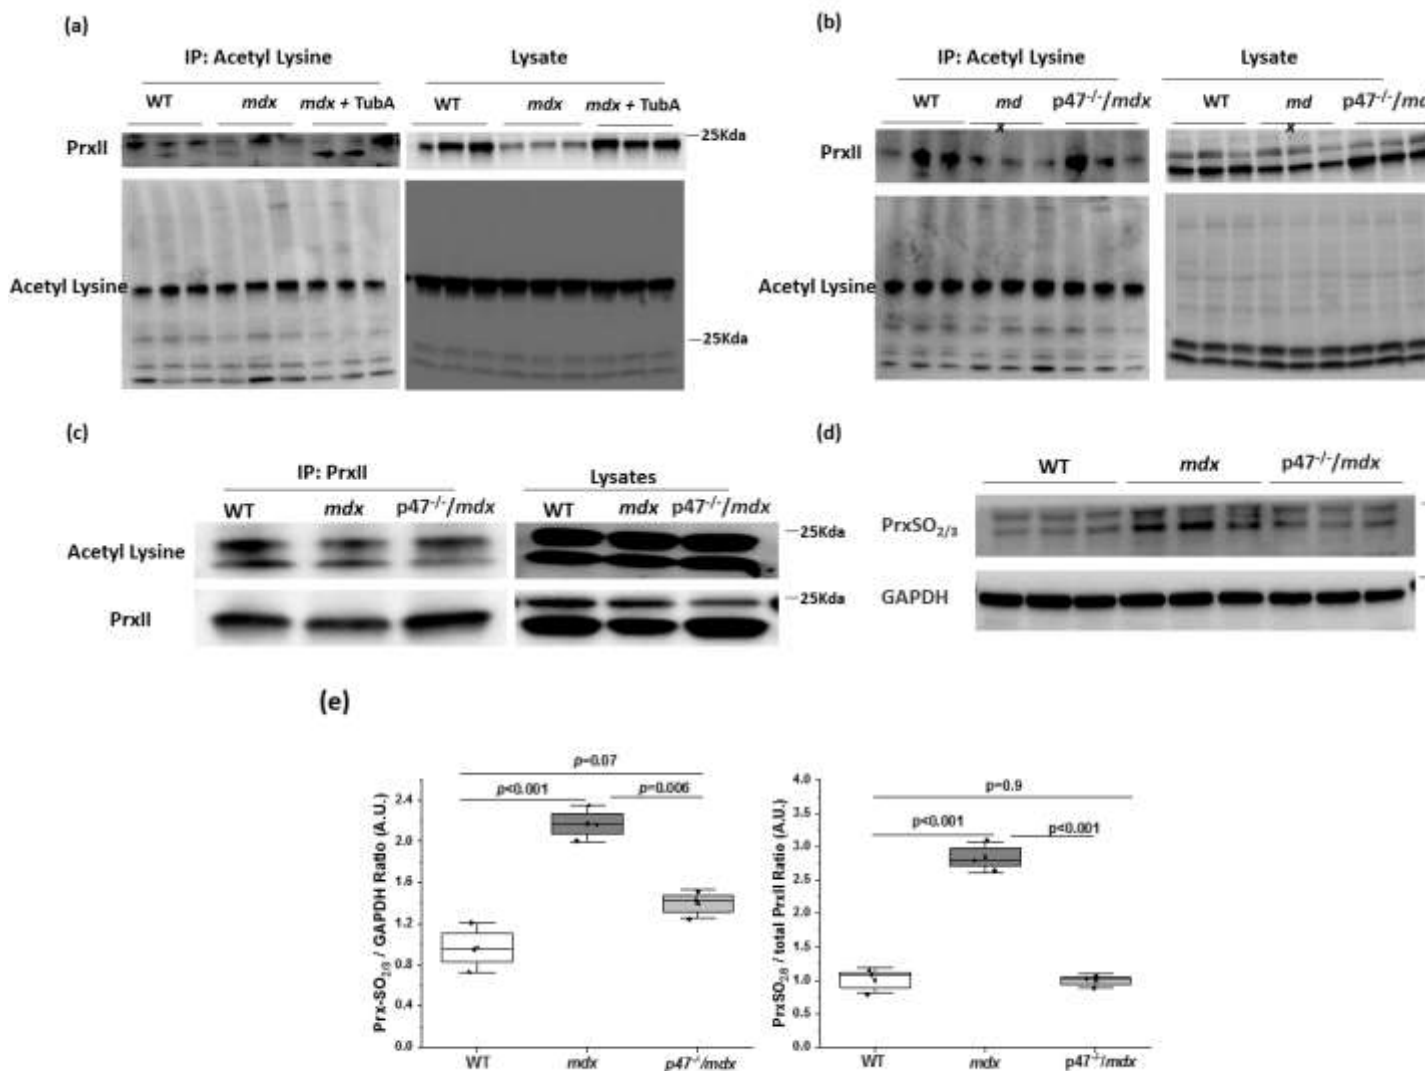

**Fig.S5. Acetylation status of PrxII in TubA treated *mdx* and genetically ablated Nox-2 *mdx* mice (a)** Skeletal muscle lysate was prepared and subjected to immunoprecipitation using anti-acetyl-lysine, and the acetylation levels of PrxII was determined with the anti-PrxII antibodies in WT, *mdx*, and TubA treated *mdx* mice (n=3 per group). Input blot of PrxII for WT *mdx* and *mdx*+TubA group in Fig.S5a are the same as shown in **Fig.6b (b)** Immunoprecipitation was performed using anti-acetyl-lysine, and the acetylation levels of PrxII was determined with the anti-PrxII antibodies in WT, *mdx*, and *p47<sup>-1</sup>/mdx* mice (n=3 per group) (c) Immunoprecipitation was performed using anti-PrxII, and the acetylation levels of PrxII was determined with the anti-acetyl lysine antibodies in WT, *mdx*, and *p47<sup>-1</sup>/mdx* mice (d-e) Immunoblot represents hyperoxidation state of PrxII (PrxSO<sub>2/3</sub>) in WT, *mdx*, and *p47<sup>-1</sup>/mdx* mice (n=3 per group). Densitometry analysis of western blots and the ratio of PrxSO<sub>2/3</sub> and total PrxII were represented by graph. GAPDH served as a loading control. Statistical difference between groups were determined using ANOVA with Tukey's *post hoc* test.

## Supplementary Figure S6

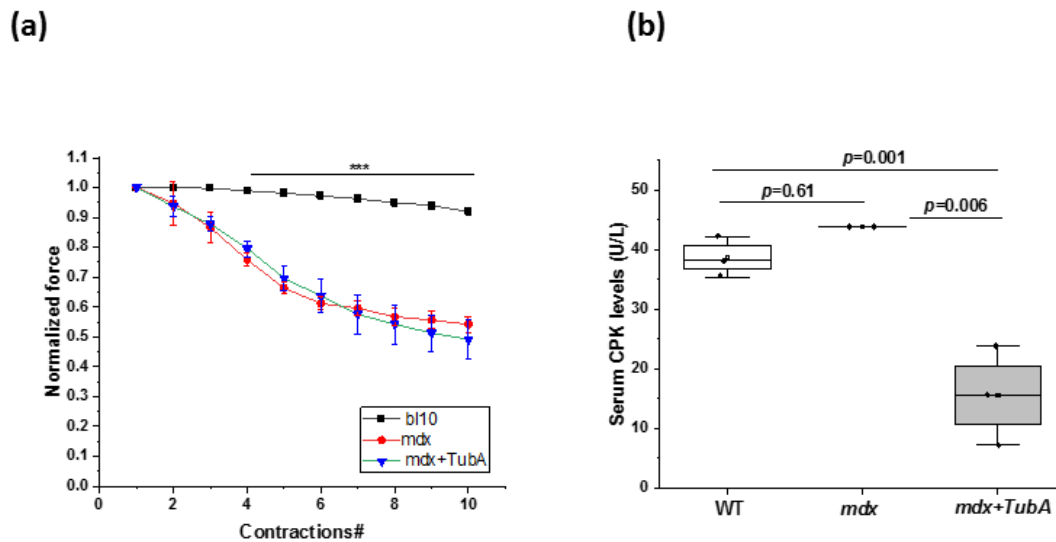

**Fig.S6 Effect of TubA on muscle contraction and damage at different dose and time point (a)** HDAC6 specific inhibitor, TubA at 30mg/kg b.w. injected into mdx mice intraperitoneally for 4 weeks every other day. After completion, EDL muscle isolated from WT (n=2), mdx (n=3), TubA treated mdx (n=3) mice and Eccentric contraction induced force drop (normalized to the first contraction) was performed. **(b)** Serum creatine kinase quantitate by ELISA from WT (n=3), mdx (n=2), TubA treated mdx (n=3) mice. Statistical difference between groups were determined using ANOVA with Tukey's *post hoc* test.\*\*\*p<0.001 vs mdx and mdx +TubA for panel a.

**Table S1: Supplementary Table 1 Primary Antibody dilutions**

| <b>Primary Antibodies</b> | <b>Company/Catalogue No.</b> | <b>Dilution</b>              |
|---------------------------|------------------------------|------------------------------|
| Anti-Beclin-1             | CST-3738S                    | <b>WB-1:1000<br/>IP-1:50</b> |
| Anti-Bcl-2                | Sigma-SAB4500003             | <b>1:800</b>                 |
| Anti-ATG14L               | Sigma-A6358                  | <b>1:1000</b>                |
| Anti-VPS34                | CST-3811                     | <b>1:1000</b>                |
| Anti-VPS15                | CST-14580S                   | <b>1:1000</b>                |
| Anti-KIF5B                | Abcam-ab167429               | <b>1:800</b>                 |
| Anti-KLC                  | Abcam-ab187179               | <b>1:1000</b>                |
| Anti-Dynein               | EMD Millipore corp-MAB1618   | <b>1:1000</b>                |
| Anti-JNK                  | CST-9252S                    | <b>1:1000</b>                |
| Anti-p-JNK                | CST-9251S                    | <b>1:1000</b>                |
| Anti-p-Bcl-2              | CST-2827S                    | <b>1:1000</b>                |
| Anti-MAPKK                | Sigma-M5795                  | <b>1:1000</b>                |
| Anti-JIP-1                | Sigma-SAB4503651             | <b>WB-1:800<br/>IP-1:50</b>  |
| Anti-WIPI-1               | Abcam-ab139722               | <b>1:1000</b>                |
| Anti-ATG7                 | CST-D12B11                   | <b>1:1000</b>                |
| Anti-ATG4B                | CST-5299S                    | <b>1:1000</b>                |
| Anti-ATG5-12              | CST-2630                     | <b>1:1000</b>                |
| Anti-LC3                  | CST-83506                    | <b>1:1000</b>                |
| Anti-P62                  | CST-5114S                    | <b>1:1000</b>                |
| Anti-STX17                | Abcam-ab229646               | <b>1:800</b>                 |
| Anti-SNAP29               | Abcam-ab181151               | <b>WB-1:1000<br/>IP-1:50</b> |

|                                  |                                       |                                     |
|----------------------------------|---------------------------------------|-------------------------------------|
| Anti-VAMP8                       | Abcam-ab76021                         | <b>WB-1:1000</b><br><b>IF-1:100</b> |
| Anti-alpha-tubulin               | CST-2144S                             | <b>1:1000</b>                       |
| Anti-Acetylated-alpha-tubulin    | Sigma-T7461                           | <b>1:800</b>                        |
| Anti-HDAC6                       | CST-7621S                             | <b>1:1000</b>                       |
| Anti-MEC17/aTAT1                 | Thermo Fischer-PAS69188               | <b>1:1000</b>                       |
| Anti-Detyrosinated alpha tubulin | Abcam-ab48389                         | <b>1:800</b>                        |
| Anti-CD68                        | Santa Cruz Biotechnologies, sc-20060  | <b>IF-1:100</b>                     |
| Anti-PrxII                       | Sigma-R8656                           | <b>WB-1:1000</b><br><b>IP:50</b>    |
| Anti-Prx-SO3                     | Abcam-ab16830                         | <b>1:800</b>                        |
| Anti-Acetyl Lysine               | CST-9441S                             | <b>WB-1:1000</b><br><b>IP-1:50</b>  |
| Anti-GAPDH                       | EMD Millipore Corp-MAB374             | <b>1:10000</b>                      |
| Anti-Caspase-3                   | CST-9662S                             | <b>1:800</b>                        |
| Anti-LAMP2                       | Santa Cruz Biotechnologies ,sc-18822  | <b>1:800</b>                        |
| Anti-Cathepsin-B                 | Santa Cruz Biotechnologies ,sc-365558 | <b>1:800</b>                        |
| Anti-alpha-laminin               | ab11575                               | <b>IF-1:100</b>                     |
| Anti-SNAP29                      | Santa Cruz Biotechnologies, sc-390602 | <b>IF:100</b>                       |

**Table S2 Supplementary Table 2 Secondary Antibodies**

| <b>Secondary antibodies</b>         | <b>Company/catalogue</b> | <b>Dilution</b> |
|-------------------------------------|--------------------------|-----------------|
| Anti-mouse                          | Sigma-GENA931            | 1:10000         |
| Anti-rabbit                         | Sigma-GENA934            | 1:10000         |
| Alexa-fluor 594 donkey anti-rabbit  | Invitrogen A21207        | 1:1000          |
| Alexa –Fluor-488-donkey anti-rabbit | Invitrogen A21206        | 1:1000          |
| Alexa-Fluor-594-goat anti-mouse     | Invitrogen A11032        | 1:1000          |
